# Supplementary material for: Serum Insights: Leveraging the Power of miRNA Profiling as an Early Diagnostic Tool for Non-Small Cell Lung Cancer
Source: MDPI journal article supplement (doi:10.3390/cancers15204910), 2023-10-10
Supplement: s1 [file s1]

# Serum miRNA-seq analysis

|                                             |           |
|---------------------------------------------|-----------|
| <b>Introduction</b>                         | <b>2</b>  |
| <b>Samples</b>                              | <b>3</b>  |
| <b>Data preprocessing</b>                   | <b>6</b>  |
| Aligning reads to the reference genome..... | 6         |
| Calculating normalized gene counts .....    | 17        |
| Files for genome browsers.....              | 20        |
| <b>Quality control</b>                      | <b>21</b> |
| Expression values .....                     | 21        |
| Correlations .....                          | 23        |
| Hierarchical clustering .....               | 26        |
| PCA.....                                    | 28        |
| <b>Differential expression analysis</b>     | <b>30</b> |
| Filtering parameters.....                   | 30        |

## Introduction

The analysis of differential expression from miRNA-seq data consists of several steps and they are presented in the figure below. The initial step in the analysis is aligning the transcriptome sequence reads to the reference genome, followed by counting the number of reads for each miRNA (Section **Data preprocessing**). The quality of the mapping and sample relations are studied using several different methods and visualization techniques in Section **Quality control**. If low quality samples or data outliers are detected they may be excluded from further analysis at this point. The data are also normalized (Section **Data preprocessing**) to reduce systematic noise caused by non-biological sources and to improve the comparability of the samples.

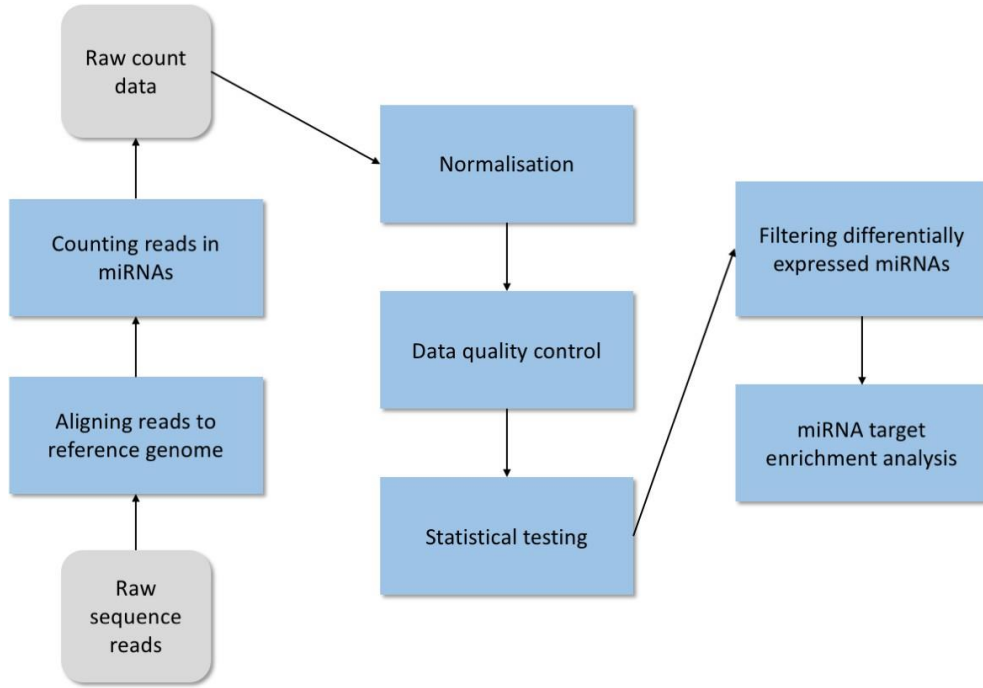

Figure S1: The analysis workflow for miRNA-seq data.

## Samples

Table S1. A general description of the samples included in the analysis.

| sampleName | groupName | origName                     |
|------------|-----------|------------------------------|
| S1         | tissue    | 1Gm_S1_L001_R1_001.fastq.gz  |
| S2         | tissue    | 1N_S2_L001_R1_001.fastq.gz   |
| S3         | tissue    | 2G_S3_L001_R1_001.fastq.gz   |
| S4         | tissue    | 2N_S4_L001_R1_001.fastq.gz   |
| S5         | tissue    | 4Gm_S5_L001_R1_001.fastq.gz  |
| S6         | tissue    | 4N_S6_L001_R1_001.fastq.gz   |
| S7         | NSCLC     | S66_S7_L001_R1_001.fastq.gZ  |
| S8         | tissue    | 5N_S8_L001_R1_001.fastq.gz   |
| S9         | NSCLC     | S1_S9_L001_R1_001.fastq.gz   |
| S10        | NSCLC     | S2_S10_L001_R1_001.fastq.gz  |
| S11        | NSCLC     | S3_S11_L001_R1_001.fastq.gz  |
| S12        | NSCLC     | S4_S12_L001_R1_001.fastq.gz  |
| S13        | NSCLC     | S5_S13_L001_R1_001.fastq.gz  |
| S14        | NSCLC     | S6_S14_L001_R1_001.fastq.gz  |
| S15        | NSCLC     | S7_S15_L001_R1_001.fastq.gz  |
| S16        | NSCLC     | S8_S16_L001_R1_001.fastq.gz  |
| S17        | NSCLC     | S55_S17_L002_R1_001.fastq.gz |
| S18        | NSCLC     | S57_S18_L002_R1_001.fastq.gz |
| S19        | NSCLC     | S64_S19_L002_R1_001.fastq.gz |
| S20        | NSCLC     | S26_S20_L002_R1_001.fastq.gz |
| S21        | NSCLC     | S27_S21_L002_R1_001.fastq.gz |
| S22        | NSCLC     | S28_S22_L002_R1_001.fastq.gz |
| S23        | NSCLC     | S29_S23_L002_R1_001.fastq.gz |

| sampleName | groupName | origName                     |
|------------|-----------|------------------------------|
| S24        | NSCLC     | S30_S24_L002_R1_001.fastq.gz |
| S25        | NSCLC     | S31_S25_L002_R1_001.fastq.gz |
| S26        | NSCLC     | S32_S26_L002_R1_001.fastq.gz |
| S27        | NSCLC     | S33_S27_L002_R1_001.fastq.gz |
| S28        | NSCLC     | S34_S28_L002_R1_001.fastq.gz |
| S29        | NSCLC     | S35_S29_L002_R1_001.fastq.gz |
| S30        | NSCLC     | S36_S30_L002_R1_001.fastq.gz |
| S31        | NSCLC     | S39_S31_L002_R1_001.fastq.gz |
| S32        | NSCLC     | S40_S32_L002_R1_001.fastq.gz |
| S33        | NSCLC     | S59_S33_L003_R1_001.fastq.gz |
| S34        | NSCLC     | S68_S34_L003_R1_001.fastq.gz |
| S35        | NSCLC     | S15_S35_L003_R1_001.fastq.gz |
| S36        | NSCLC     | S16_S36_L003_R1_001.fastq.gz |
| S37        | NSCLC     | S17_S37_L003_R1_001.fastq.gz |
| S38        | NSCLC     | S18_S38_L003_R1_001.fastq.gz |
| S39        | NSCLC     | S19_S39_L003_R1_001.fastq.gz |
| S40        | NSCLC     | S20_S40_L003_R1_001.fastq.gz |
| S41        | NSCLC     | S21_S41_L003_R1_001.fastq.gz |
| S42        | NSCLC     | S22_S42_L003_R1_001.fastq.gz |
| S43        | NSCLC     | S23_S43_L003_R1_001.fastq.gz |
| S44        | NSCLC     | S12_S44_L003_R1_001.fastq.gz |
| S45        | NSCLC     | S24_S45_L003_R1_001.fastq.gz |
| S46        | NSCLC     | S25_S46_L003_R1_001.fastq.gz |
| S47        | NSCLC     | S37_S47_L003_R1_001.fastq.gz |
| S48        | NSCLC     | S38_S48_L003_R1_001.fastq.gz |
| S49        | NSCLC     | S53_S49_L004_R1_001.fastq.gz |
| S50        | NSCLC     | S62_S50_L004_R1_001.fastq.gz |
| S51        | NSCLC     | S67_S51_L004_R1_001.fastq.gz |
| S52        | NSCLC     | S48_S52_L004_R1_001.fastq.gz |
| S53        | NSCLC     | S71_S53_L004_R1_001.fastq.gz |
| S54        | Control   | S72_S54_L004_R1_001.fastq.gz |
| S55        | Control   | S73_S55_L004_R1_001.fastq.gz |
| S56        | Control   | S74_S56_L004_R1_001.fastq.gz |
| S57        | Control   | S75_S57_L004_R1_001.fastq.gz |
| S58        | Control   | S76_S58_L004_R1_001.fastq.gz |
| S59        | Control   | S77_S59_L004_R1_001.fastq.gz |
| S60        | Control   | S78_S60_L004_R1_001.fastq.gz |
| S61        | Control   | S79_S61_L004_R1_001.fastq.gz |
| S62        | Control   | S80_S62_L004_R1_001.fastq.gz |
| S63        | Control   | S81_S63_L004_R1_001.fastq.gz |
| S64        | Control   | S82_S64_L004_R1_001.fastq.gz |
| S65        | NSCLC     | S54_S65_L005_R1_001.fastq.gz |
| S66        | NSCLC     | S63_S66_L005_R1_001.fastq.gz |
| S67        | Control   | S85_S67_L005_R1_001.fastq.gz |
| S68        | NSCLC     | S9_S68_L005_R1_001.fastq.gz  |
| S69        | NSCLC     | S10_S69_L005_R1_001.fastq.gz |
| S70        | NSCLC     | S11_S70_L005_R1_001.fastq.gz |
| S71        | Control   | S86_S71_L005_R1_001.fastq.gz |
| S72        | Control   | S87_S72_L005_R1_001.fastq.gz |
| S73        | Control   | S88_S73_L005_R1_001.fastq.gz |
| S74        | Control   | S89_S74_L005_R1_001.fastq.gz |
| S75        | Control   | S90_S75_L005_R1_001.fastq.gz |

| sampleName | groupName | origName                       |
|------------|-----------|--------------------------------|
| S76        | Control   | S91_S76_L005_R1_001.fastq.gz   |
| S77        | Control   | S92_S77_L005_R1_001.fastq.gz   |
| S78        | Control   | S93_S78_L005_R1_001.fastq.gz   |
| S79        | Control   | S94_S79_L005_R1_001.fastq.gz   |
| S80        | Control   | S95_S80_L005_R1_001.fastq.gz   |
| S81        | NSCLC     | S60_S81_L006_R1_001.fastq.gz   |
| S82        | NSCLC     | S69_S82_L006_R1_001.fastq.gz   |
| S83        | NSCLC     | S13_S83_L006_R1_001.fastq.gz   |
| S84        | NSCLC     | S14_S84_L006_R1_001.fastq.gz   |
| S85        | Control   | S96_S85_L006_R1_001.fastq.gz   |
| S86        | Control   | S97_S86_L006_R1_001.fastq.gz   |
| S87        | Control   | S98_S87_L006_R1_001.fastq.gz   |
| S88        | Control   | S99_S88_L006_R1_001.fastq.gz   |
| S89        | Control   | S100_S89_L006_R1_001.fastq.gz  |
| S90        | Control   | S101_S90_L006_R1_001.fastq.gz  |
| S91        | Control   | S102_S91_L006_R1_001.fastq.gz  |
| S92        | Control   | S103_S92_L006_R1_001.fastq.gz  |
| S93        | Control   | S104_S93_L006_R1_001.fastq.gz  |
| S94        | Control   | S105_S94_L006_R1_001.fastq.gz  |
| S95        | Control   | S106_S95_L006_R1_001.fastq.gz  |
| S96        | Control   | S107_S96_L006_R1_001.fastq.gz  |
| S97        | NSCLC     | S56_S97_L007_R1_001.fastq.gz   |
| S98        | NSCLC     | S58_S98_L007_R1_001.fastq.gz   |
| S99        | NSCLC     | S65_S99_L007_R1_001.fastq.gz   |
| S100       | NSCLC     | S41_S100_L007_R1_001.fastq.gz  |
| S101       | NSCLC     | S42_S101_L007_R1_001.fastq.gz  |
| S102       | NSCLC     | S43_S102_L007_R1_001.fastq.gz  |
| S103       | NSCLC     | S44_S103_L007_R1_001.fastq.gz  |
| S104       | NSCLC     | S45_S104_L007_R1_001.fastq.gz  |
| S105       | NSCLC     | S46_S105_L007_R1_001.fastq.gz  |
| S106       | NSCLC     | S47_S106_L007_R1_001.fastq.gz  |
| S107       | NSCLC     | S49_S107_L007_R1_001.fastq.gz  |
| S108       | NSCLC     | S50_S108_L007_R1_001.fastq.gz  |
| S109       | NSCLC     | S51_S109_L007_R1_001.fastq.gz  |
| S110       | NSCLC     | S52_S110_L007_R1_001.fastq.gz  |
| S111       | Control   | S83_S111_L007_R1_001.fastq.gz  |
| S112       | Control   | S84_S112_L007_R1_001.fastq.gz  |
| S113       | NSCLC     | S61_S113_L008_R1_001.fastq.gz  |
| S114       | NSCLC     | S70_S114_L008_R1_001.fastq.gz  |
| S115       | Control   | S108_S115_L008_R1_001.fastq.gz |
| S116       | Control   | S109_S116_L008_R1_001.fastq.gz |
| S117       | Control   | S111_S117_L008_R1_001.fastq.gz |
| S118       | Control   | S112_S118_L008_R1_001.fastq.gz |
| S119       | Control   | S113_S119_L008_R1_001.fastq.gz |
| S120       | Control   | S114_S120_L008_R1_001.fastq.gz |
| S121       | Control   | S115_S121_L008_R1_001.fastq.gz |
| S122       | Control   | S116_S122_L008_R1_001.fastq.gz |
| S123       | Control   | S117_S123_L008_R1_001.fastq.gz |
| S124       | Control   | S118_S124_L008_R1_001.fastq.gz |
| S125       | Control   | S119_S125_L008_R1_001.fastq.gz |

## Data preprocessing

### Aligning reads to the reference genome

The reads obtained from the instrument were base called using the instrument manufacturer's base calling software. Prior to alignment the reads were trimmed with cutadapt first to remove the adapter contamination and then to trim the four random bases from both ends of the reads.

The samples contained ExiSEQ spike-ins, so first the reads were aligned to the spike-ins with Bowtie2. The percentage of reads mapping to the spike-ins is provided in the table below.

**Samples S1, S2, S3, S4, S5, S6, and S8 originated from lung tumors and were not part of the current study.**

Table S2: Alignment metrics for spike-in reads

| Sample    | Total reads | Uniquely mapped | % uniquely mapped | Multiply mapped | % multiply mapped |
|-----------|-------------|-----------------|-------------------|-----------------|-------------------|
| S1_tissue | 15723608    | 99745           | 0.63%             | 23              | 0.00%             |
| S2_tissue | 28017692    | 323239          | 1.15%             | 28              | 0.00%             |
| S3_tissue | 21280830    | 268931          | 1.26%             | 13              | 0.00%             |
| S4_tissue | 20491251    | 191558          | 0.93%             | 25              | 0.00%             |
| S5_tissue | 17683215    | 147610          | 0.83%             | 20              | 0.00%             |
| S6_tissue | 24134335    | 404744          | 1.68%             | 69              | 0.00%             |
| S7_NSCLC  | 21763760    | 316345          | 1.45%             | 2               | 0.00%             |
| S8_tissue | 25153442    | 301268          | 1.20%             | 8               | 0.00%             |
| S9_NSCLC  | 12921140    | 266650          | 2.06%             | 196             | 0.00%             |
| S10_NSCLC | 22887717    | 233556          | 1.02%             | 329             | 0.00%             |
| S11_NSCLC | 25516327    | 319044          | 1.25%             | 0               | 0.00%             |
| S12_NSCLC | 20415989    | 134283          | 0.66%             | 2               | 0.00%             |
| S13_NSCLC | 18606846    | 302775          | 1.63%             | 374             | 0.00%             |
| S14_NSCLC | 20689020    | 418230          | 2.02%             | 251             | 0.00%             |
| S15_NSCLC | 18777929    | 225196          | 1.20%             | 55              | 0.00%             |
| S16_NSCLC | 20884435    | 475427          | 2.28%             | 673             | 0.00%             |
| S17_NSCLC | 18318017    | 14215           | 0.08%             | 1               | 0.00%             |
| S18_NSCLC | 15809607    | 89994           | 0.57%             | 77              | 0.00%             |
| S19_NSCLC | 14914307    | 39620           | 0.27%             | 0               | 0.00%             |
| S20_NSCLC | 12152018    | 273032          | 2.25%             | 226             | 0.00%             |
| S21_NSCLC | 12993984    | 178153          | 1.37%             | 113             | 0.00%             |
| S22_NSCLC | 15323543    | 349261          | 2.28%             | 486             | 0.00%             |
| S23_NSCLC | 20839135    | 172716          | 0.83%             | 1               | 0.00%             |
| S24_NSCLC | 15363302    | 128268          | 0.83%             | 2               | 0.00%             |
| S25_NSCLC | 15016833    | 365808          | 2.44%             | 386             | 0.00%             |
| S26_NSCLC | 15092710    | 418187          | 2.77%             | 230             | 0.00%             |
| S27_NSCLC | 14790432    | 393278          | 2.66%             | 531             | 0.00%             |
| S28_NSCLC | 13528748    | 391941          | 2.90%             | 275             | 0.00%             |
| S29_NSCLC | 17993628    | 292502          | 1.63%             | 786             | 0.00%             |
| S30_NSCLC | 15209731    | 228180          | 1.50%             | 308             | 0.00%             |
| S31_NSCLC | 15857805    | 5049            | 0.03%             | 0               | 0.00%             |
| S32_NSCLC | 12111478    | 305783          | 2.52%             | 400             | 0.00%             |
| S33_NSCLC | 23272221    | 94179           | 0.40%             | 1               | 0.00%             |
| S34_NSCLC | 20230213    | 123405          | 0.61%             | 3               | 0.00%             |
| S35_NSCLC | 19797821    | 464935          | 2.35%             | 250             | 0.00%             |
| S36_NSCLC | 17648154    | 876354          | 4.97%             | 880             | 0.00%             |
| S37_NSCLC | 18981445    | 375029          | 1.98%             | 408             | 0.00%             |
| S38_NSCLC | 20705938    | 326286          | 1.58%             | 563             | 0.00%             |
| S39_NSCLC | 16399461    | 367774          | 2.24%             | 386             | 0.00%             |

|           |          |        |       |     |       |
|-----------|----------|--------|-------|-----|-------|
| S40_NSCLC | 25463960 | 385451 | 1.51% | 505 | 0.00% |
|-----------|----------|--------|-------|-----|-------|

| Sample      | Total reads | Uniquely mapped | % uniquely mapped | Multiply mapped | % multiply mapped |
|-------------|-------------|-----------------|-------------------|-----------------|-------------------|
| S41_NSCLC   | 17343461    | 427536          | 2.47%             | 1104            | 0.01%             |
| S42_NSCLC   | 19248447    | 492784          | 2.56%             | 462             | 0.00%             |
| S43_NSCLC   | 21093707    | 174837          | 0.83%             | 0               | 0.00%             |
| S44_NSCLC   | 16278765    | 46639           | 0.29%             | 1435            | 0.01%             |
| S45_NSCLC   | 14783046    | 8237            | 0.06%             | 0               | 0.00%             |
| S46_NSCLC   | 20391890    | 23100           | 0.11%             | 1               | 0.00%             |
| S47_NSCLC   | 20389118    | 13943           | 0.07%             | 0               | 0.00%             |
| S48_NSCLC   | 18004481    | 17262           | 0.10%             | 1               | 0.00%             |
| S49_NSCLC   | 22874462    | 49062           | 0.21%             | 0               | 0.00%             |
| S50_NSCLC   | 16897339    | 106036          | 0.63%             | 0               | 0.00%             |
| S51_NSCLC   | 25134011    | 72888           | 0.29%             | 6               | 0.00%             |
| S52_NSCLC   | 21872797    | 75504           | 0.35%             | 0               | 0.00%             |
| S53_NSCLC   | 22919205    | 463838          | 2.02%             | 350             | 0.00%             |
| S54_Control | 13643738    | 292606          | 2.14%             | 297             | 0.00%             |
| S55_Control | 16925216    | 244681          | 1.45%             | 321             | 0.00%             |
| S56_Control | 18874921    | 518240          | 2.75%             | 320             | 0.00%             |
| S57_Control | 11599851    | 249584          | 2.15%             | 260             | 0.00%             |
| S58_Control | 13229780    | 324787          | 2.45%             | 509             | 0.00%             |
| S59_Control | 22676456    | 584585          | 2.58%             | 588             | 0.00%             |
| S60_Control | 15999352    | 489614          | 3.06%             | 500             | 0.00%             |
| S61_Control | 20961032    | 361021          | 1.72%             | 118             | 0.00%             |
| S62_Control | 18173181    | 229047          | 1.26%             | 1               | 0.00%             |
| S63_Control | 20969901    | 262483          | 1.25%             | 208             | 0.00%             |
| S64_Control | 18954578    | 325848          | 1.72%             | 188             | 0.00%             |
| S65_NSCLC   | 22220830    | 30476           | 0.14%             | 0               | 0.00%             |
| S66_NSCLC   | 15542265    | 154850          | 1.00%             | 4               | 0.00%             |
| S67_Control | 19303144    | 249643          | 1.29%             | 1               | 0.00%             |
| S68_NSCLC   | 18036408    | 274626          | 1.52%             | 390             | 0.00%             |
| S69_NSCLC   | 14255076    | 429908          | 3.02%             | 844             | 0.01%             |
| S70_NSCLC   | 16045186    | 550296          | 3.43%             | 818             | 0.01%             |
| S71_Control | 15769310    | 425953          | 2.70%             | 151             | 0.00%             |
| S72_Control | 16792542    | 429867          | 2.56%             | 604             | 0.00%             |
| S73_Control | 20001245    | 326458          | 1.63%             | 219             | 0.00%             |
| S74_Control | 23441576    | 644912          | 2.75%             | 668             | 0.00%             |
| S75_Control | 20084322    | 473423          | 2.36%             | 968             | 0.00%             |
| S76_Control | 22153908    | 675252          | 3.05%             | 673             | 0.00%             |
| S77_Control | 21232876    | 739848          | 3.48%             | 715             | 0.00%             |
| S78_Control | 23072030    | 367102          | 1.59%             | 541             | 0.00%             |
| S79_Control | 20097737    | 537631          | 2.68%             | 371             | 0.00%             |
| S80_Control | 29190164    | 830102          | 2.84%             | 1052            | 0.00%             |
| S81_NSCLC   | 23428444    | 329692          | 1.41%             | 216             | 0.00%             |
| S82_NSCLC   | 16671912    | 44118           | 0.26%             | 0               | 0.00%             |
| S83_NSCLC   | 20846268    | 1131749         | 5.43%             | 950             | 0.00%             |
| S84_NSCLC   | 19247191    | 445170          | 2.31%             | 444             | 0.00%             |
| S85_Control | 20468848    | 631864          | 3.09%             | 1244            | 0.01%             |
| S86_Control | 15959776    | 510916          | 3.20%             | 588             | 0.00%             |
| S87_Control | 18429513    | 499459          | 2.71%             | 1190            | 0.01%             |
| S88_Control | 21280015    | 479320          | 2.25%             | 3               | 0.00%             |
| S89_Control | 20224136    | 696320          | 3.44%             | 722             | 0.00%             |
| S90_Control | 24810610    | 527783          | 2.13%             | 849             | 0.00%             |
| S91_Control | 21241871    | 463606          | 2.18%             | 1989            | 0.01%             |
| S92_Control | 20033562    | 675940          | 3.37%             | 575             | 0.00%             |



| Sample       | Total reads | Uniquely mapped | % uniquely mapped | Multiply mapped | % multiply mapped |
|--------------|-------------|-----------------|-------------------|-----------------|-------------------|
| S93_Control  | 17130268    | 315933          | 1.84%             | 372             | 0.00%             |
| S94_Control  | 12448685    | 443956          | 3.57%             | 279             | 0.00%             |
| S95_Control  | 20635636    | 210430          | 1.02%             | 6               | 0.00%             |
| S96_Control  | 23710691    | 345430          | 1.46%             | 281             | 0.00%             |
| S97_NSCLC    | 23667586    | 104719          | 0.44%             | 0               | 0.00%             |
| S98_NSCLC    | 21532696    | 115422          | 0.54%             | 4               | 0.00%             |
| S99_NSCLC    | 19336124    | 28529           | 0.15%             | 0               | 0.00%             |
| S100_NSCLC   | 16724289    | 12009           | 0.07%             | 0               | 0.00%             |
| S101_NSCLC   | 17290180    | 151203          | 0.87%             | 0               | 0.00%             |
| S102_NSCLC   | 17713070    | 94065           | 0.53%             | 0               | 0.00%             |
| S103_NSCLC   | 17421167    | 72427           | 0.42%             | 0               | 0.00%             |
| S104_NSCLC   | 17203235    | 12336           | 0.07%             | 0               | 0.00%             |
| S105_NSCLC   | 18469163    | 58092           | 0.31%             | 0               | 0.00%             |
| S106_NSCLC   | 24504236    | 100257          | 0.41%             | 35              | 0.00%             |
| S107_NSCLC   | 25885897    | 83561           | 0.32%             | 0               | 0.00%             |
| S108_NSCLC   | 19912881    | 20796           | 0.10%             | 0               | 0.00%             |
| S109_NSCLC   | 19632303    | 12055           | 0.06%             | 64              | 0.00%             |
| S110_NSCLC   | 19115945    | 36157           | 0.19%             | 2               | 0.00%             |
| S111_Control | 18222655    | 344070          | 1.89%             | 464             | 0.00%             |
| S112_Control | 17496531    | 201909          | 1.15%             | 0               | 0.00%             |
| S113_NSCLC   | 19315162    | 341191          | 1.77%             | 211             | 0.00%             |
| S114_NSCLC   | 21359010    | 578940          | 2.71%             | 823             | 0.00%             |
| S115_Control | 28397481    | 392940          | 1.38%             | 523             | 0.00%             |
| S116_Control | 23524507    | 577182          | 2.45%             | 910             | 0.00%             |
| S117_Control | 23025338    | 1049941         | 4.56%             | 381             | 0.00%             |
| S118_Control | 26710149    | 330671          | 1.24%             | 1               | 0.00%             |
| S119_Control | 23627962    | 536871          | 2.27%             | 2               | 0.00%             |
| S120_Control | 19064047    | 497021          | 2.61%             | 220             | 0.00%             |
| S121_Control | 27268667    | 720990          | 2.64%             | 1734            | 0.01%             |
| S122_Control | 23522916    | 251949          | 1.07%             | 169             | 0.00%             |
| S123_Control | 20982578    | 207506          | 0.99%             | 430             | 0.00%             |
| S124_Control | 17661138    | 25124           | 0.14%             | 2               | 0.00%             |
| S125_Control | 19438159    | 204292          | 1.05%             | 3               | 0.00%             |

The remaining reads were then aligned against the *Homo sapiens* reference genome (Ensembl GRCh38 release) with STAR version 2.5.3a using 2-pass alignment mode. The miRbase annotation was used in both mapping and read counting. The mapping percentages varied between the samples, and a summary of the alignment statistics is provided in the table below.

Table S3: Alignment metrics for genomic reads

| Sample    | Reads    | Unique mapped | % unique mapped | Multiple mapped | % multiple mapped |
|-----------|----------|---------------|-----------------|-----------------|-------------------|
| S1_tissue | 15723608 | 12531494      | 79.70%          | 2852462         | 18.14%            |
| S2_tissue | 28017692 | 17315433      | 61.80%          | 8055588         | 28.75%            |
| S3_tissue | 21280830 | 13960508      | 65.60%          | 5258867         | 24.71%            |
| S4_tissue | 20491251 | 14774426      | 72.10%          | 5352261         | 26.12%            |
| S5_tissue | 17683215 | 12363155      | 69.91%          | 4799998         | 27.14%            |
| S6_tissue | 24134335 | 16428667      | 68.07%          | 7121163         | 29.51%            |
| S7_NSCLC  | 21763760 | 6304303       | 28.97%          | 10739014        | 49.34%            |
| S8_tissue | 25153442 | 16217808      | 64.48%          | 7677914         | 30.52%            |
| S9_NSCLC  | 12921140 | 5369512       | 41.56%          | 5506236         | 42.61%            |

| Sample      | Reads    | Unique mapped | % unique mapped | Multiple mapped | % multiple mapped |
|-------------|----------|---------------|-----------------|-----------------|-------------------|
| S10_NSCLC   | 22887717 | 9922876       | 43.35%          | 8465153         | 36.99%            |
| S11_NSCLC   | 25516327 | 8403385       | 32.93%          | 10499139        | 41.15%            |
| S12_NSCLC   | 20415989 | 5410710       | 26.50%          | 8801471         | 43.11%            |
| S13_NSCLC   | 18606846 | 7964698       | 42.81%          | 7743905         | 41.62%            |
| S14_NSCLC   | 20689020 | 6918329       | 33.44%          | 8769830         | 42.39%            |
| S15_NSCLC   | 18777929 | 6099979       | 32.48%          | 7683331         | 40.92%            |
| S16_NSCLC   | 20884435 | 7237139       | 34.65%          | 9926978         | 47.53%            |
| S17_NSCLC   | 18318017 | 4339149       | 23.69%          | 8711621         | 47.56%            |
| S18_NSCLC   | 15809607 | 4895297       | 30.96%          | 6990677         | 44.22%            |
| S19_NSCLC   | 14914307 | 3943591       | 26.44%          | 6854549         | 45.96%            |
| S20_NSCLC   | 12152018 | 4753042       | 39.11%          | 5139301         | 42.29%            |
| S21_NSCLC   | 12993984 | 5041527       | 38.80%          | 4627092         | 35.61%            |
| S22_NSCLC   | 15323543 | 6625329       | 43.24%          | 6640115         | 43.33%            |
| S23_NSCLC   | 20839135 | 5121534       | 24.58%          | 7345596         | 35.25%            |
| S24_NSCLC   | 15363302 | 4688936       | 30.52%          | 7119118         | 46.34%            |
| S25_NSCLC   | 15016833 | 7309217       | 48.67%          | 5492322         | 36.57%            |
| S26_NSCLC   | 15092710 | 5539610       | 36.70%          | 6029442         | 39.95%            |
| S27_NSCLC   | 14790432 | 5835853       | 39.46%          | 5800867         | 39.22%            |
| S28_NSCLC   | 13528748 | 4967788       | 36.72%          | 5840583         | 43.17%            |
| S29_NSCLC   | 17993628 | 6576243       | 36.55%          | 7504669         | 41.71%            |
| S30_NSCLC   | 15209731 | 5829551       | 38.33%          | 6406123         | 42.12%            |
| S31_NSCLC   | 15857805 | 4519378       | 28.50%          | 7015384         | 44.24%            |
| S32_NSCLC   | 12111478 | 4967947       | 41.02%          | 4927120         | 40.68%            |
| S33_NSCLC   | 23272221 | 6513740       | 27.99%          | 11584983        | 49.78%            |
| S34_NSCLC   | 20230213 | 5870503       | 29.02%          | 9349114         | 46.21%            |
| S35_NSCLC   | 19797821 | 7402037       | 37.39%          | 7075917         | 35.74%            |
| S36_NSCLC   | 17648154 | 7764871       | 44.00%          | 7160994         | 40.58%            |
| S37_NSCLC   | 18981445 | 8048611       | 42.40%          | 7643709         | 40.27%            |
| S38_NSCLC   | 20705938 | 7417170       | 35.82%          | 8672259         | 41.88%            |
| S39_NSCLC   | 16399461 | 7002055       | 42.70%          | 6552837         | 39.96%            |
| S40_NSCLC   | 25463960 | 12367974      | 48.57%          | 8379779         | 32.91%            |
| S41_NSCLC   | 17343461 | 7021383       | 40.48%          | 7102104         | 40.95%            |
| S42_NSCLC   | 19248447 | 8352904       | 43.40%          | 8033567         | 41.74%            |
| S43_NSCLC   | 21093707 | 10428589      | 49.44%          | 7422832         | 35.19%            |
| S44_NSCLC   | 16278765 | 4248686       | 26.10%          | 7649426         | 46.99%            |
| S45_NSCLC   | 14783046 | 4350807       | 29.43%          | 6896817         | 46.65%            |
| S46_NSCLC   | 20391890 | 6692240       | 32.82%          | 8933474         | 43.81%            |
| S47_NSCLC   | 20389118 | 5816870       | 28.53%          | 9480994         | 46.50%            |
| S48_NSCLC   | 18004481 | 5550503       | 30.83%          | 7903082         | 43.90%            |
| S49_NSCLC   | 22874462 | 4979913       | 21.77%          | 10496542        | 45.89%            |
| S50_NSCLC   | 16897339 | 4130409       | 24.44%          | 8176511         | 48.39%            |
| S51_NSCLC   | 25134011 | 5541965       | 22.05%          | 13505514        | 53.73%            |
| S52_NSCLC   | 21872797 | 5849719       | 26.74%          | 10561686        | 48.29%            |
| S53_NSCLC   | 22919205 | 8826876       | 38.51%          | 8820836         | 38.49%            |
| S54_Control | 13643738 | 5570593       | 40.83%          | 5598067         | 41.03%            |
| S55_Control | 16925216 | 7000184       | 41.36%          | 6731989         | 39.77%            |
| S56_Control | 18874921 | 7380097       | 39.10%          | 8105931         | 42.95%            |
| S57_Control | 11599851 | 4173819       | 35.98%          | 4653838         | 40.12%            |
| S58_Control | 13229780 | 5386647       | 40.72%          | 5293139         | 40.01%            |
| S59_Control | 22676456 | 10345999      | 45.62%          | 9156553         | 40.38%            |
| S60_Control | 15999352 | 6492144       | 40.58%          | 6773744         | 42.34%            |
| S61_Control | 20961032 | 6996452       | 33.38%          | 7479351         | 35.68%            |

| Sample       | Reads    | Unique mapped | % unique mapped | Multiple mapped | % multiple mapped |
|--------------|----------|---------------|-----------------|-----------------|-------------------|
| S62_Control  | 18173181 | 7011347       | 38.58%          | 7034979         | 38.71%            |
| S63_Control  | 20969901 | 7143202       | 34.06%          | 9178993         | 43.77%            |
| S64_Control  | 18954578 | 7412977       | 39.11%          | 6837187         | 36.07%            |
| S65_NSCLC    | 22220830 | 6221160       | 28.00%          | 10410228        | 46.85%            |
| S66_NSCLC    | 15542265 | 4202939       | 27.04%          | 8313593         | 53.49%            |
| S67_Control  | 19303144 | 6512061       | 33.74%          | 8038669         | 41.64%            |
| S68_NSCLC    | 18036408 | 6340734       | 35.16%          | 7116844         | 39.46%            |
| S69_NSCLC    | 14255076 | 6297334       | 44.18%          | 5871579         | 41.19%            |
| S70_NSCLC    | 16045186 | 6812710       | 42.46%          | 6467998         | 40.31%            |
| S71_Control  | 15769310 | 6057446       | 38.41%          | 6170267         | 39.13%            |
| S72_Control  | 16792542 | 5728486       | 34.11%          | 7780675         | 46.33%            |
| S73_Control  | 20001245 | 5493722       | 27.47%          | 8908304         | 44.54%            |
| S74_Control  | 23441576 | 8595946       | 36.67%          | 9591325         | 40.92%            |
| S75_Control  | 20084322 | 6617799       | 32.95%          | 8480471         | 42.22%            |
| S76_Control  | 22153908 | 7691040       | 34.72%          | 10254917        | 46.29%            |
| S77_Control  | 21232876 | 7936897       | 37.38%          | 9458035         | 44.54%            |
| S78_Control  | 23072030 | 7742605       | 33.56%          | 9438380         | 40.91%            |
| S79_Control  | 20097737 | 8552604       | 42.56%          | 7543776         | 37.54%            |
| S80_Control  | 29190164 | 12135066      | 41.57%          | 11290369        | 38.68%            |
| S81_NSCLC    | 23428444 | 6381732       | 27.24%          | 10772993        | 45.98%            |
| S82_NSCLC    | 16671912 | 4566511       | 27.39%          | 8074537         | 48.43%            |
| S83_NSCLC    | 20846268 | 8179710       | 39.24%          | 8610167         | 41.30%            |
| S84_NSCLC    | 19247191 | 8882143       | 46.15%          | 6224346         | 32.34%            |
| S85_Control  | 20468848 | 8128054       | 39.71%          | 7871547         | 38.46%            |
| S86_Control  | 15959776 | 6068020       | 38.02%          | 7222988         | 45.26%            |
| S87_Control  | 18429513 | 6752035       | 36.64%          | 7727423         | 41.93%            |
| S88_Control  | 21280015 | 6542904       | 30.75%          | 9320514         | 43.80%            |
| S89_Control  | 20224136 | 7614633       | 37.65%          | 8780886         | 43.42%            |
| S90_Control  | 24810610 | 9283930       | 37.42%          | 8994433         | 36.25%            |
| S91_Control  | 21241871 | 7603342       | 35.79%          | 8543346         | 40.22%            |
| S92_Control  | 20033562 | 7242989       | 36.15%          | 8702010         | 43.44%            |
| S93_Control  | 17130268 | 5148246       | 30.05%          | 7794974         | 45.50%            |
| S94_Control  | 12448685 | 5361902       | 43.07%          | 5125173         | 41.17%            |
| S95_Control  | 20635636 | 6296213       | 30.51%          | 8365253         | 40.54%            |
| S96_Control  | 23710691 | 8046408       | 33.94%          | 7530414         | 31.76%            |
| S97_NSCLC    | 23667586 | 5805781       | 24.53%          | 11621827        | 49.10%            |
| S98_NSCLC    | 21532696 | 6255992       | 29.05%          | 9695149         | 45.03%            |
| S99_NSCLC    | 19336124 | 6504760       | 33.64%          | 8494585         | 43.93%            |
| S100_NSCLC   | 16724289 | 4934509       | 29.51%          | 7561276         | 45.21%            |
| S101_NSCLC   | 17290180 | 5500006       | 31.81%          | 9293397         | 53.75%            |
| S102_NSCLC   | 17713070 | 5322455       | 30.05%          | 7996800         | 45.15%            |
| S103_NSCLC   | 17421167 | 5046625       | 28.97%          | 8091363         | 46.45%            |
| S104_NSCLC   | 17203235 | 5111295       | 29.71%          | 7581176         | 44.07%            |
| S105_NSCLC   | 18469163 | 5454480       | 29.53%          | 8102729         | 43.87%            |
| S106_NSCLC   | 24504236 | 7651642       | 31.23%          | 9286308         | 37.90%            |
| S107_NSCLC   | 25885897 | 7169515       | 27.70%          | 11815390        | 45.64%            |
| S108_NSCLC   | 19912881 | 6636664       | 33.33%          | 7896704         | 39.66%            |
| S109_NSCLC   | 19632303 | 5340168       | 27.20%          | 8832472         | 44.99%            |
| S110_NSCLC   | 19115945 | 5951769       | 31.14%          | 8420761         | 44.05%            |
| S111_Control | 18222655 | 7318109       | 40.16%          | 7737399         | 42.46%            |
| S112_Control | 17496531 | 6138799       | 35.09%          | 8024056         | 45.86%            |
| S113_NSCLC   | 19315162 | 6283527       | 32.53%          | 9131125         | 47.27%            |

| Sample       | Reads    | Unique mapped | % unique mapped | Multiple mapped | % multiple mapped |
|--------------|----------|---------------|-----------------|-----------------|-------------------|
| S114_NSCLC   | 21359010 | 8002730       | 37.47%          | 9134030         | 42.76%            |
| S115_Control | 28397481 | 10216966      | 35.98%          | 11939622        | 42.04%            |
| S116_Control | 23524507 | 9272876       | 39.42%          | 9764762         | 41.51%            |
| S117_Control | 23025338 | 9178295       | 39.86%          | 8973421         | 38.97%            |
| S118_Control | 26710149 | 11245221      | 42.10%          | 9916365         | 37.13%            |
| S119_Control | 23627962 | 9085531       | 38.45%          | 10303243        | 43.61%            |
| S120_Control | 19064047 | 7744792       | 40.63%          | 7945900         | 41.68%            |
| S121_Control | 27268667 | 10522094      | 38.59%          | 11740908        | 43.06%            |
| S122_Control | 23522916 | 9796369       | 41.65%          | 9438056         | 40.12%            |
| S123_Control | 20982578 | 6953202       | 33.14%          | 8911537         | 42.47%            |
| S124_Control | 17661138 | 4848786       | 27.45%          | 8308865         | 47.05%            |
| S125_Control | 19438159 | 6638318       | 34.15%          | 8614028         | 44.32%            |

After alignment, the number of both spike-ins and genomic reads assigned to each miRNA was counted using featureCounts from R package Rsubread. For genomic reads multiply mapping reads were also taken into account. All (100%) of the spike-in reads could be assigned to the spike-ins. The histograms show the distribution of the genomic read counts after featureCounts analysis. Most of the reads should be assigned to miRNA features.

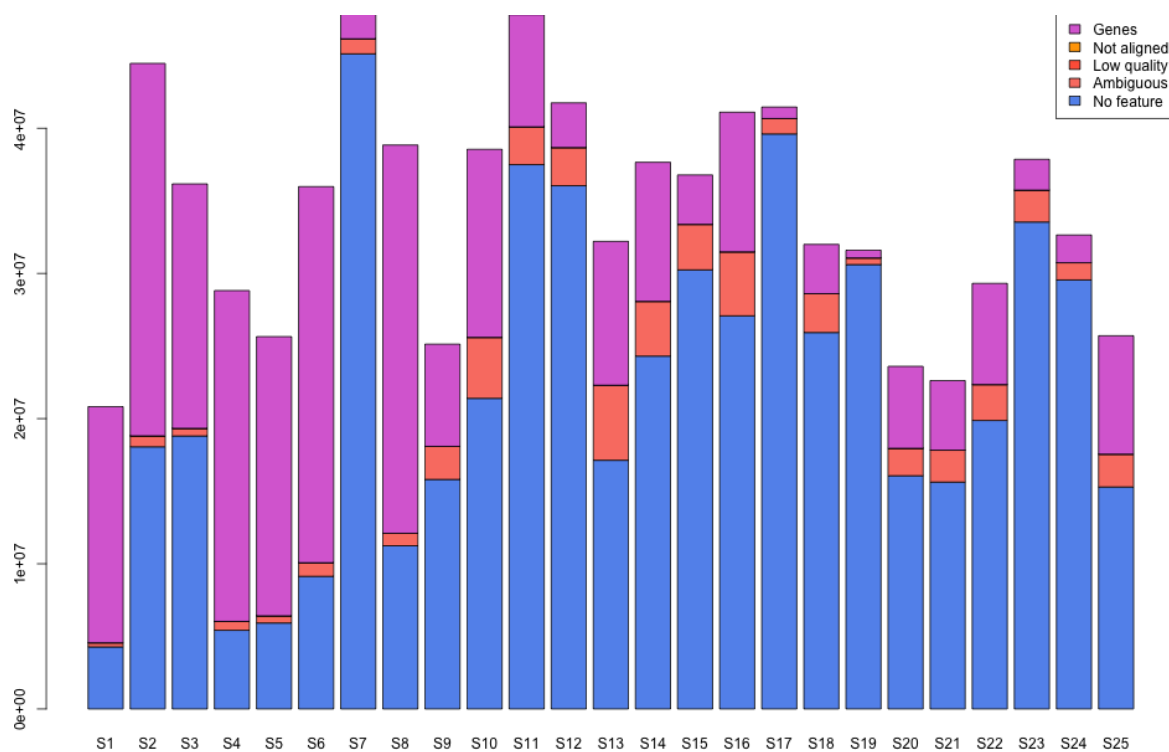

Figure S2: Histogram representing the distribution of reads in feature counting for samples S1-S25.

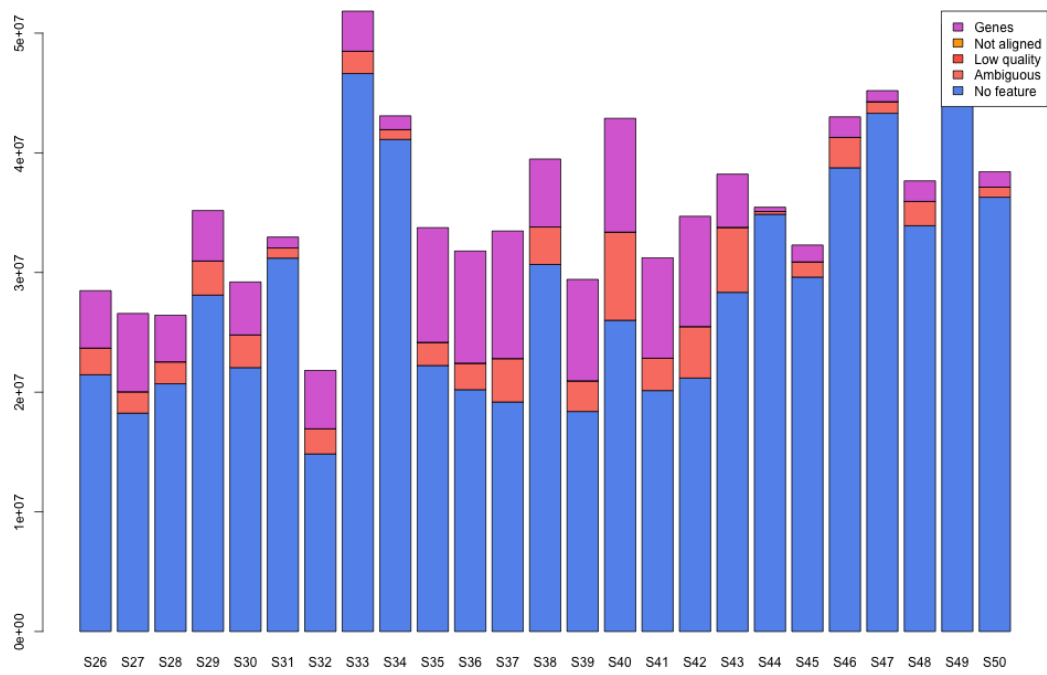

Figure S3: Histogram representing the distribution of reads in feature counting for samples S26-S50.

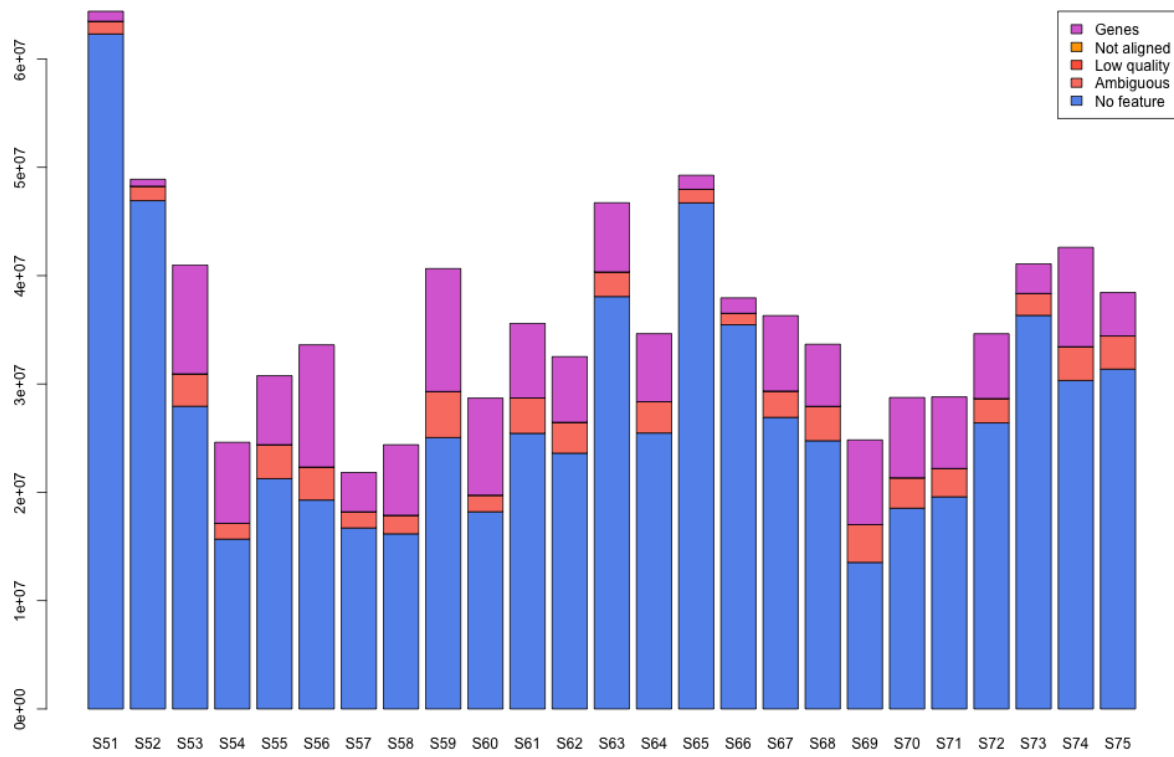

Figure S4: Histogram representing the distribution of reads in feature counting for samples S51-S75.

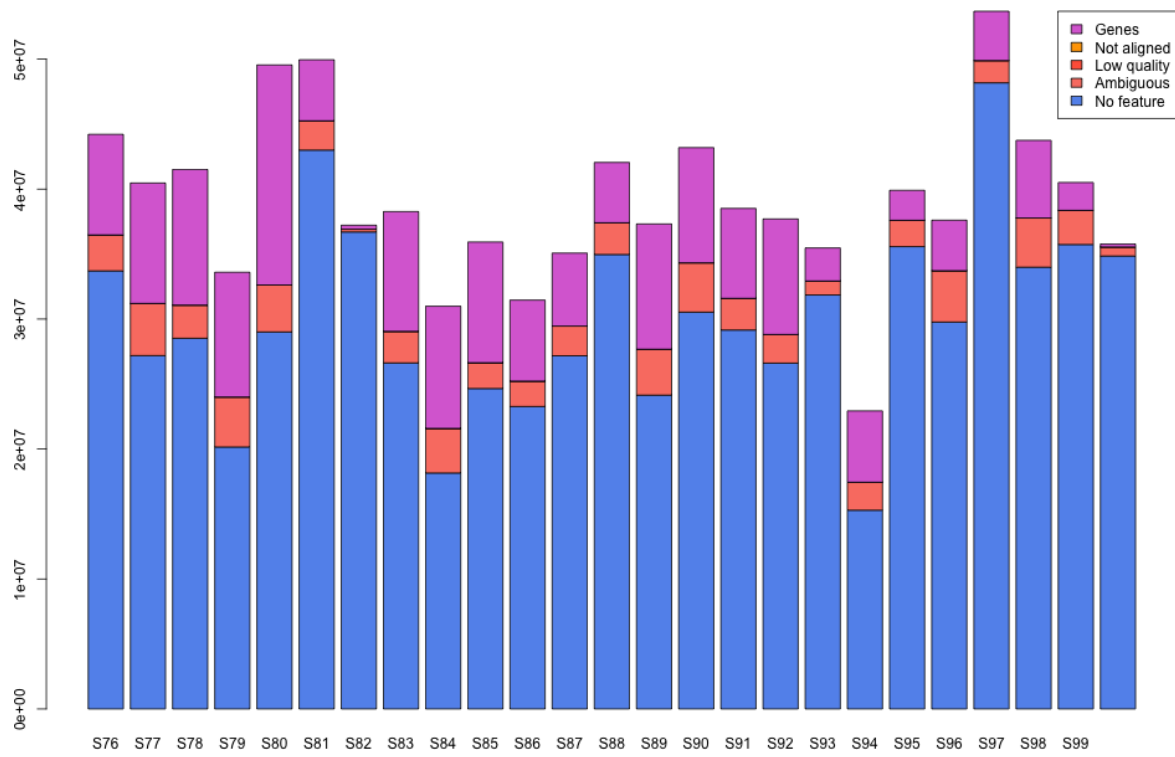

Figure S5: Histogram representing the distribution of reads in feature counting for samples S76-S100.

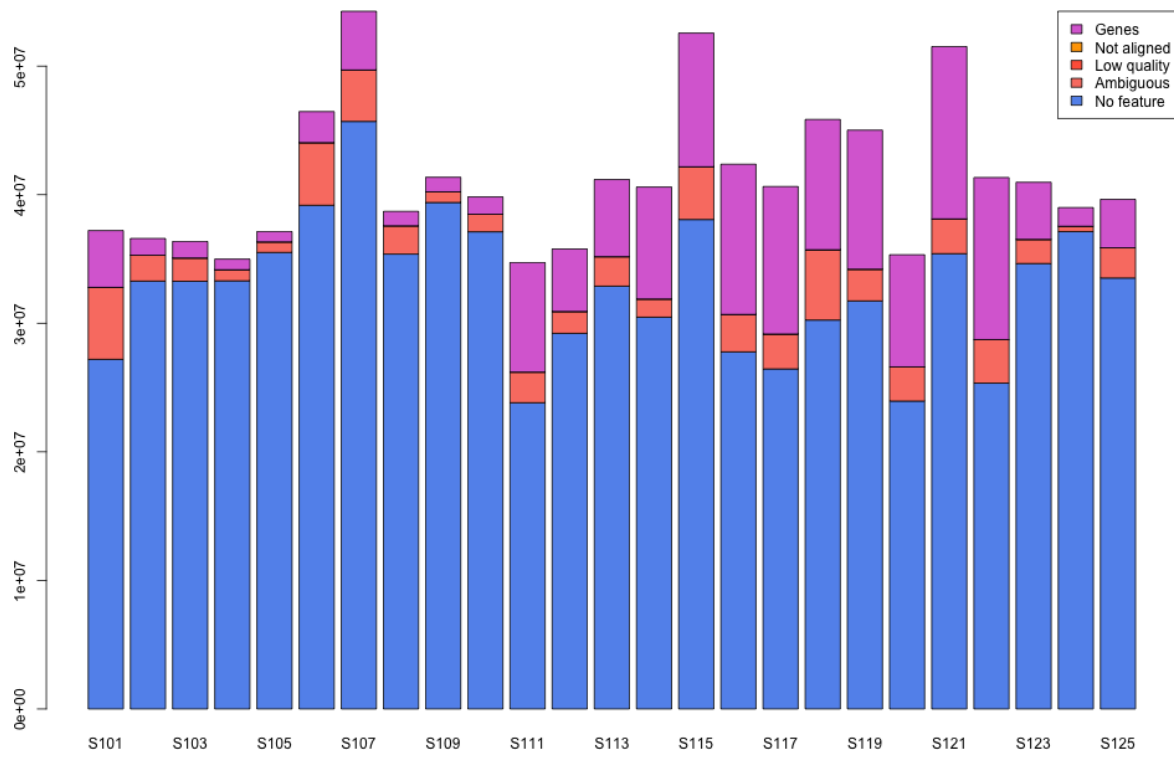

Figure S6: Histogram representing the distribution of reads in feature counting for samples S101-S125.



## Calculating normalized gene counts

The data are normalised to remove variation between samples caused by non-biological reasons and to make the values comparable across the sample set. Here the counts were normalised using the TMM normalisation method of the edgeRR/Bioconductor package (R version 3.4.1, Bioconductor version 3.5). The method takes the variable number of total reads across samples into account by calculating specific scaling factors between the samples.

For statistical testing the data were further log transformed using the voom approach in the limma package. For the visualizations and result files the TMM normalised counts are represented as TPM values, which make the values not only between samples but also between genes comparable. However, due to the relative nature of miRNA-seq experiments, we strongly recommend using these values only as approximate measures of expression and not as accurate values, e.g. a gene can be considered as lowly, middle or highly expressed based on its TPM value.

The distribution of the TPM values in each sample is presented in the table below. The TPM value column denotes the TPM value threshold and the number of genes that have a TPM value greater than the threshold is given for each sample.

Table S4. The distribution of the TPM values in each sample

| TPM value | S1   | S2   | S3   | S4   | S5   | S6   | S7   | S8   | S9   | S10  | S11  | S12  | S13  | S14  |
|-----------|------|------|------|------|------|------|------|------|------|------|------|------|------|------|
| 0         | 2588 | 2588 | 2588 | 2588 | 2588 | 2588 | 2588 | 2588 | 2588 | 2588 | 2588 | 2588 | 2588 | 2588 |
| 1         | 505  | 522  | 549  | 507  | 513  | 555  | 327  | 542  | 458  | 462  | 247  | 265  | 347  | 363  |
| 3         | 355  | 400  | 411  | 378  | 392  | 415  | 260  | 399  | 439  | 446  | 221  | 239  | 341  | 353  |
| 5         | 325  | 356  | 370  | 337  | 355  | 360  | 230  | 347  | 412  | 426  | 216  | 230  | 338  | 347  |
| 10        | 264  | 300  | 312  | 279  | 297  | 297  | 219  | 293  | 351  | 350  | 211  | 218  | 302  | 327  |
| 15        | 233  | 270  | 273  | 252  | 268  | 264  | 211  | 265  | 309  | 296  | 203  | 217  | 274  | 290  |
| 25        | 204  | 231  | 235  | 215  | 227  | 231  | 207  | 220  | 253  | 264  | 199  | 212  | 220  | 243  |
| 30        | 195  | 223  | 218  | 207  | 209  | 217  | 206  | 207  | 243  | 247  | 196  | 212  | 203  | 232  |
| 40        | 182  | 202  | 204  | 186  | 198  | 198  | 202  | 193  | 223  | 227  | 196  | 209  | 186  | 206  |
| 50        | 171  | 188  | 195  | 174  | 187  | 182  | 199  | 182  | 203  | 207  | 193  | 208  | 173  | 188  |
| 100       | 131  | 149  | 148  | 139  | 149  | 151  | 189  | 145  | 157  | 159  | 157  | 177  | 131  | 143  |

| TPM value | S15  | S16  | S17  | S18  | S19  | S20  | S21  | S22  | S23  | S24  | S25  | S26  | S27  | S28  |
|-----------|------|------|------|------|------|------|------|------|------|------|------|------|------|------|
| 0         | 2588 | 2588 | 2588 | 2588 | 2588 | 2588 | 2588 | 2588 | 2588 | 2588 | 2588 | 2588 | 2588 | 2588 |
| 1         | 307  | 295  | 274  | 282  | 285  | 511  | 444  | 454  | 321  | 226  | 425  | 429  | 343  | 354  |
| 3         | 281  | 288  | 189  | 274  | 205  | 484  | 433  | 436  | 309  | 199  | 412  | 411  | 329  | 346  |
| 5         | 274  | 282  | 181  | 270  | 180  | 439  | 410  | 407  | 306  | 194  | 384  | 402  | 322  | 343  |
| 10        | 270  | 271  | 158  | 267  | 159  | 352  | 344  | 344  | 300  | 191  | 321  | 349  | 301  | 335  |
| 15        | 268  | 259  | 150  | 259  | 146  | 307  | 298  | 303  | 293  | 190  | 270  | 312  | 276  | 315  |
| 25        | 262  | 228  | 142  | 245  | 135  | 266  | 244  | 256  | 279  | 186  | 224  | 253  | 239  | 281  |
| 30        | 254  | 211  | 139  | 235  | 134  | 257  | 226  | 236  | 271  | 184  | 212  | 238  | 224  | 267  |
| 40        | 244  | 185  | 138  | 217  | 132  | 225  | 202  | 214  | 247  | 182  | 190  | 217  | 205  | 234  |
| 50        | 229  | 173  | 137  | 205  | 130  | 210  | 183  | 192  | 224  | 177  | 175  | 196  | 183  | 213  |
| 100       | 182  | 136  | 135  | 159  | 125  | 167  | 155  | 150  | 170  | 159  | 134  | 156  | 141  | 170  |

| TPM value | S29  | S30  | S31  | S32  | S33  | S34  | S35  | S36  | S37  | S38  | S39  | S40  | S41  | S42  |
|-----------|------|------|------|------|------|------|------|------|------|------|------|------|------|------|
| 0         | 2588 | 2588 | 2588 | 2588 | 2588 | 2588 | 2588 | 2588 | 2588 | 2588 | 2588 | 2588 | 2588 | 2588 |
| 1         | 301  | 320  | 237  | 304  | 191  | 244  | 497  | 334  | 476  | 294  | 410  | 413  | 281  | 433  |
| 3         | 294  | 310  | 157  | 299  | 172  | 206  | 436  | 324  | 450  | 288  | 406  | 408  | 276  | 426  |
| 5         | 288  | 307  | 131  | 292  | 167  | 189  | 374  | 321  | 397  | 285  | 392  | 390  | 274  | 402  |
| 10        | 283  | 291  | 115  | 278  | 161  | 180  | 296  | 293  | 318  | 280  | 336  | 356  | 265  | 341  |

| TPM value | S29 | S30 | S31 | S32 | S33 | S34 | S35 | S36 | S37 | S38 | S39 | S40 | S41 | S42 |
|-----------|-----|-----|-----|-----|-----|-----|-----|-----|-----|-----|-----|-----|-----|-----|
| 15        | 279 | 280 | 109 | 257 | 161 | 174 | 265 | 272 | 276 | 271 | 302 | 310 | 259 | 293 |
| 25        | 269 | 259 | 101 | 226 | 161 | 170 | 218 | 221 | 233 | 239 | 255 | 259 | 229 | 239 |
| 30        | 263 | 254 | 98  | 214 | 161 | 169 | 207 | 210 | 216 | 227 | 241 | 234 | 213 | 226 |
| 40        | 243 | 231 | 96  | 194 | 161 | 169 | 190 | 192 | 195 | 214 | 218 | 215 | 195 | 206 |
| 50        | 226 | 209 | 96  | 178 | 160 | 167 | 174 | 177 | 183 | 191 | 194 | 207 | 179 | 189 |
| 100       | 182 | 159 | 89  | 140 | 154 | 164 | 150 | 146 | 153 | 146 | 152 | 157 | 145 | 156 |

| TPM value | S43  | S44  | S45  | S46  | S47  | S48  | S49  | S50  | S51  | S52  | S53  | S54  | S55  | S56  |
|-----------|------|------|------|------|------|------|------|------|------|------|------|------|------|------|
| 0         | 2588 | 2588 | 2588 | 2588 | 2588 | 2588 | 2588 | 2588 | 2588 | 2588 | 2588 | 2588 | 2588 | 2588 |
| 1         | 181  | 254  | 189  | 199  | 256  | 200  | 300  | 242  | 362  | 292  | 348  | 291  | 300  | 404  |
| 3         | 171  | 183  | 152  | 147  | 159  | 141  | 205  | 216  | 237  | 228  | 342  | 285  | 299  | 393  |
| 5         | 168  | 183  | 143  | 135  | 134  | 128  | 198  | 208  | 213  | 182  | 339  | 279  | 298  | 364  |
| 10        | 166  | 136  | 129  | 119  | 108  | 110  | 183  | 206  | 184  | 165  | 310  | 271  | 285  | 299  |
| 15        | 166  | 112  | 127  | 114  | 99   | 105  | 180  | 205  | 182  | 157  | 268  | 258  | 270  | 259  |
| 25        | 162  | 100  | 124  | 114  | 89   | 101  | 171  | 203  | 174  | 146  | 228  | 232  | 240  | 222  |
| 30        | 160  | 96   | 124  | 114  | 84   | 101  | 171  | 203  | 174  | 145  | 209  | 219  | 229  | 208  |
| 40        | 160  | 88   | 123  | 114  | 82   | 97   | 167  | 202  | 174  | 143  | 189  | 205  | 207  | 190  |
| 50        | 160  | 82   | 122  | 109  | 80   | 96   | 166  | 199  | 172  | 142  | 171  | 196  | 193  | 174  |
| 100       | 146  | 69   | 113  | 106  | 72   | 93   | 159  | 183  | 166  | 138  | 141  | 154  | 152  | 141  |

| TPM value | S57  | S58  | S59  | S60  | S61  | S62  | S63  | S64  | S65  | S66  | S67  | S68  | S69  | S70  |
|-----------|------|------|------|------|------|------|------|------|------|------|------|------|------|------|
| 0         | 2588 | 2588 | 2588 | 2588 | 2588 | 2588 | 2588 | 2588 | 2588 | 2588 | 2588 | 2588 | 2588 | 2588 |
| 1         | 309  | 350  | 340  | 314  | 464  | 208  | 322  | 336  | 224  | 284  | 231  | 335  | 421  | 319  |
| 3         | 301  | 343  | 337  | 313  | 443  | 205  | 319  | 329  | 184  | 258  | 220  | 331  | 411  | 313  |
| 5         | 299  | 340  | 332  | 310  | 418  | 205  | 314  | 326  | 164  | 249  | 220  | 326  | 397  | 312  |
| 10        | 294  | 325  | 305  | 299  | 351  | 202  | 304  | 302  | 151  | 247  | 217  | 315  | 334  | 308  |
| 15        | 280  | 304  | 268  | 274  | 306  | 202  | 286  | 273  | 141  | 245  | 215  | 296  | 298  | 304  |
| 25        | 264  | 254  | 225  | 235  | 251  | 199  | 247  | 243  | 136  | 242  | 211  | 263  | 229  | 260  |
| 30        | 253  | 237  | 212  | 220  | 235  | 195  | 231  | 218  | 136  | 241  | 205  | 247  | 218  | 248  |
| 40        | 229  | 214  | 188  | 203  | 214  | 192  | 209  | 205  | 135  | 237  | 195  | 224  | 201  | 232  |
| 50        | 209  | 198  | 178  | 193  | 197  | 185  | 194  | 188  | 132  | 225  | 174  | 209  | 190  | 210  |
| 100       | 152  | 145  | 136  | 150  | 153  | 154  | 149  | 140  | 124  | 195  | 128  | 166  | 148  | 158  |

| TPM value | S71  | S72  | S73  | S74  | S75  | S76  | S77  | S78  | S79  | S80  | S81  | S82  | S83  | S84  |
|-----------|------|------|------|------|------|------|------|------|------|------|------|------|------|------|
| 0         | 2588 | 2588 | 2588 | 2588 | 2588 | 2588 | 2588 | 2588 | 2588 | 2588 | 2588 | 2588 | 2588 | 2588 |
| 1         | 422  | 338  | 233  | 282  | 252  | 280  | 285  | 274  | 338  | 392  | 355  | 271  | 393  | 561  |
| 3         | 413  | 329  | 216  | 279  | 246  | 277  | 282  | 270  | 334  | 384  | 343  | 271  | 386  | 489  |
| 5         | 397  | 324  | 214  | 278  | 243  | 277  | 279  | 268  | 324  | 369  | 342  | 202  | 378  | 411  |
| 10        | 343  | 305  | 212  | 270  | 239  | 268  | 272  | 263  | 307  | 299  | 329  | 149  | 336  | 338  |
| 15        | 292  | 279  | 211  | 261  | 238  | 261  | 268  | 254  | 272  | 249  | 314  | 140  | 299  | 296  |
| 25        | 242  | 243  | 207  | 239  | 232  | 243  | 235  | 211  | 230  | 219  | 274  | 129  | 237  | 241  |
| 30        | 227  | 232  | 207  | 224  | 228  | 231  | 225  | 200  | 218  | 206  | 264  | 121  | 221  | 228  |
| 40        | 209  | 209  | 204  | 209  | 219  | 212  | 207  | 177  | 200  | 179  | 233  | 113  | 206  | 210  |
| 50        | 188  | 198  | 202  | 191  | 207  | 201  | 190  | 165  | 185  | 169  | 214  | 111  | 193  | 191  |
| 100       | 157  | 145  | 181  | 148  | 155  | 159  | 161  | 131  | 150  | 132  | 163  | 100  | 145  | 154  |

| TPM value | S85  | S86  | S87  | S88  | S89  | S90  | S91  | S92  | S93  | S94  | S95  | S96  | S97  | S98  |
|-----------|------|------|------|------|------|------|------|------|------|------|------|------|------|------|
| 0         | 2588 | 2588 | 2588 | 2588 | 2588 | 2588 | 2588 | 2588 | 2588 | 2588 | 2588 | 2588 | 2588 | 2588 |
| 1         | 315  | 242  | 292  | 255  | 355  | 316  | 245  | 312  | 215  | 385  | 223  | 273  | 229  | 320  |
| 3         | 312  | 237  | 286  | 246  | 350  | 309  | 236  | 307  | 188  | 377  | 199  | 261  | 216  | 316  |
| 5         | 310  | 233  | 282  | 245  | 337  | 305  | 229  | 303  | 182  | 370  | 196  | 258  | 214  | 314  |
| 10        | 302  | 230  | 278  | 239  | 320  | 293  | 224  | 293  | 180  | 351  | 192  | 253  | 212  | 298  |
| 15        | 287  | 229  | 275  | 237  | 290  | 284  | 222  | 277  | 177  | 326  | 191  | 249  | 212  | 275  |
| 25        | 254  | 221  | 267  | 230  | 248  | 249  | 214  | 236  | 176  | 273  | 190  | 242  | 209  | 237  |
| 30        | 239  | 216  | 260  | 229  | 230  | 231  | 208  | 221  | 176  | 250  | 190  | 239  | 209  | 222  |
| 40        | 221  | 196  | 240  | 225  | 211  | 211  | 191  | 197  | 175  | 232  | 189  | 229  | 206  | 201  |
| 50        | 204  | 181  | 225  | 209  | 193  | 199  | 177  | 188  | 174  | 216  | 188  | 217  | 200  | 185  |
| 100       | 155  | 139  | 176  | 153  | 163  | 162  | 134  | 153  | 165  | 163  | 177  | 161  | 166  | 146  |

| TPM value | S99  | S100 | S101 | S102 | S103 | S104 | S105 | S106 | S107 | S108 | S109 | S110 | S111 | S112 |
|-----------|------|------|------|------|------|------|------|------|------|------|------|------|------|------|
| 0         | 2588 | 2588 | 2588 | 2588 | 2588 | 2588 | 2588 | 2588 | 2588 | 2588 | 2588 | 2588 | 2588 | 2588 |
| 1         | 186  | 203  | 362  | 268  | 231  | 228  | 251  | 245  | 299  | 189  | 194  | 178  | 321  | 210  |
| 3         | 164  | 203  | 351  | 245  | 215  | 159  | 181  | 239  | 291  | 145  | 176  | 145  | 312  | 203  |
| 5         | 158  | 150  | 349  | 243  | 212  | 145  | 163  | 238  | 289  | 134  | 165  | 139  | 309  | 203  |
| 10        | 156  | 127  | 340  | 238  | 208  | 136  | 159  | 237  | 286  | 124  | 159  | 134  | 296  | 198  |
| 15        | 156  | 113  | 313  | 236  | 205  | 133  | 159  | 234  | 270  | 123  | 158  | 134  | 277  | 193  |
| 25        | 155  | 97   | 269  | 233  | 202  | 130  | 159  | 225  | 242  | 119  | 154  | 134  | 238  | 190  |
| 30        | 154  | 93   | 254  | 233  | 201  | 127  | 158  | 219  | 225  | 119  | 152  | 132  | 226  | 189  |
| 40        | 154  | 84   | 225  | 230  | 200  | 126  | 157  | 209  | 202  | 119  | 151  | 131  | 193  | 187  |
| 50        | 151  | 82   | 210  | 226  | 197  | 125  | 156  | 201  | 178  | 119  | 150  | 131  | 180  | 182  |
| 100       | 141  | 68   | 162  | 213  | 182  | 122  | 152  | 160  | 138  | 115  | 133  | 123  | 137  | 149  |

| TPM value | S113 | S114 | S115 | S116 | S117 | S118 | S119 | S120 | S121 | S122 | S123 | S124 | S125 |
|-----------|------|------|------|------|------|------|------|------|------|------|------|------|------|
| 0         | 2588 | 2588 | 2588 | 2588 | 2588 | 2588 | 2588 | 2588 | 2588 | 2588 | 2588 | 2588 | 2588 |
| 1         | 364  | 290  | 263  | 301  | 477  | 275  | 283  | 318  | 321  | 309  | 205  | 210  | 209  |
| 3         | 353  | 280  | 253  | 296  | 446  | 270  | 278  | 314  | 315  | 300  | 194  | 144  | 180  |
| 5         | 348  | 275  | 249  | 292  | 405  | 266  | 274  | 311  | 312  | 299  | 192  | 125  | 174  |
| 10        | 334  | 271  | 246  | 281  | 326  | 259  | 267  | 294  | 282  | 287  | 188  | 106  | 168  |
| 15        | 302  | 261  | 245  | 257  | 298  | 251  | 259  | 282  | 246  | 265  | 186  | 100  | 167  |
| 25        | 264  | 235  | 236  | 233  | 252  | 221  | 232  | 255  | 212  | 232  | 184  | 93   | 166  |
| 30        | 244  | 225  | 226  | 211  | 233  | 206  | 220  | 244  | 198  | 227  | 184  | 90   | 165  |
| 40        | 220  | 207  | 207  | 193  | 207  | 190  | 202  | 218  | 176  | 212  | 183  | 89   | 165  |
| 50        | 205  | 184  | 192  | 186  | 195  | 177  | 185  | 195  | 162  | 198  | 179  | 89   | 165  |
| 100       | 155  | 143  | 152  | 141  | 154  | 139  | 144  | 153  | 130  | 151  | 152  | 86   | 157  |

## Files for genome browsers

Various different genome browsers can be used for viewing the aligned count data in genomic context with a variety of different annotations. Figure 7 shows an example of the data viewed with the IGV Genome Browser available at the Broad Institute.

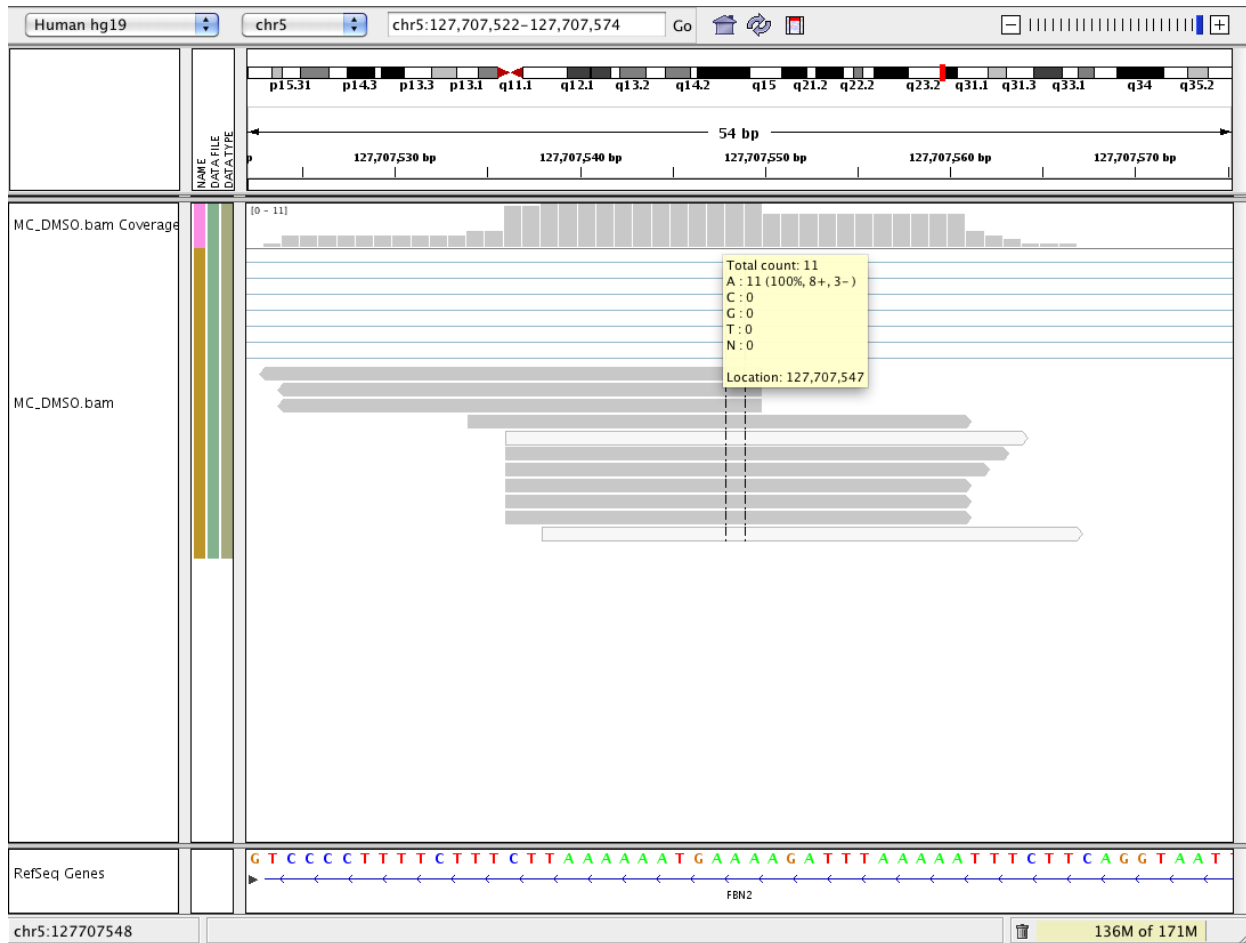

Figure S7: Snapshot from IGV Genome Browser.

## Quality control

Quality control is an important step in the analysis to assess the overall quality of the samples, to see how well the replicates correlate with each other and to identify possible outliers. Here, several widely used methods have been used for quality control.

## Expression values

Figure S8 visualizes the expression value distribution across the sample set and the table shows the minimum, median, mean and maximum expression values of the normalized samples.

|        | x      |
|--------|--------|
| Min.   | 0      |
| Median | 0      |
| Mean   | 819    |
| Max.   | 199384 |

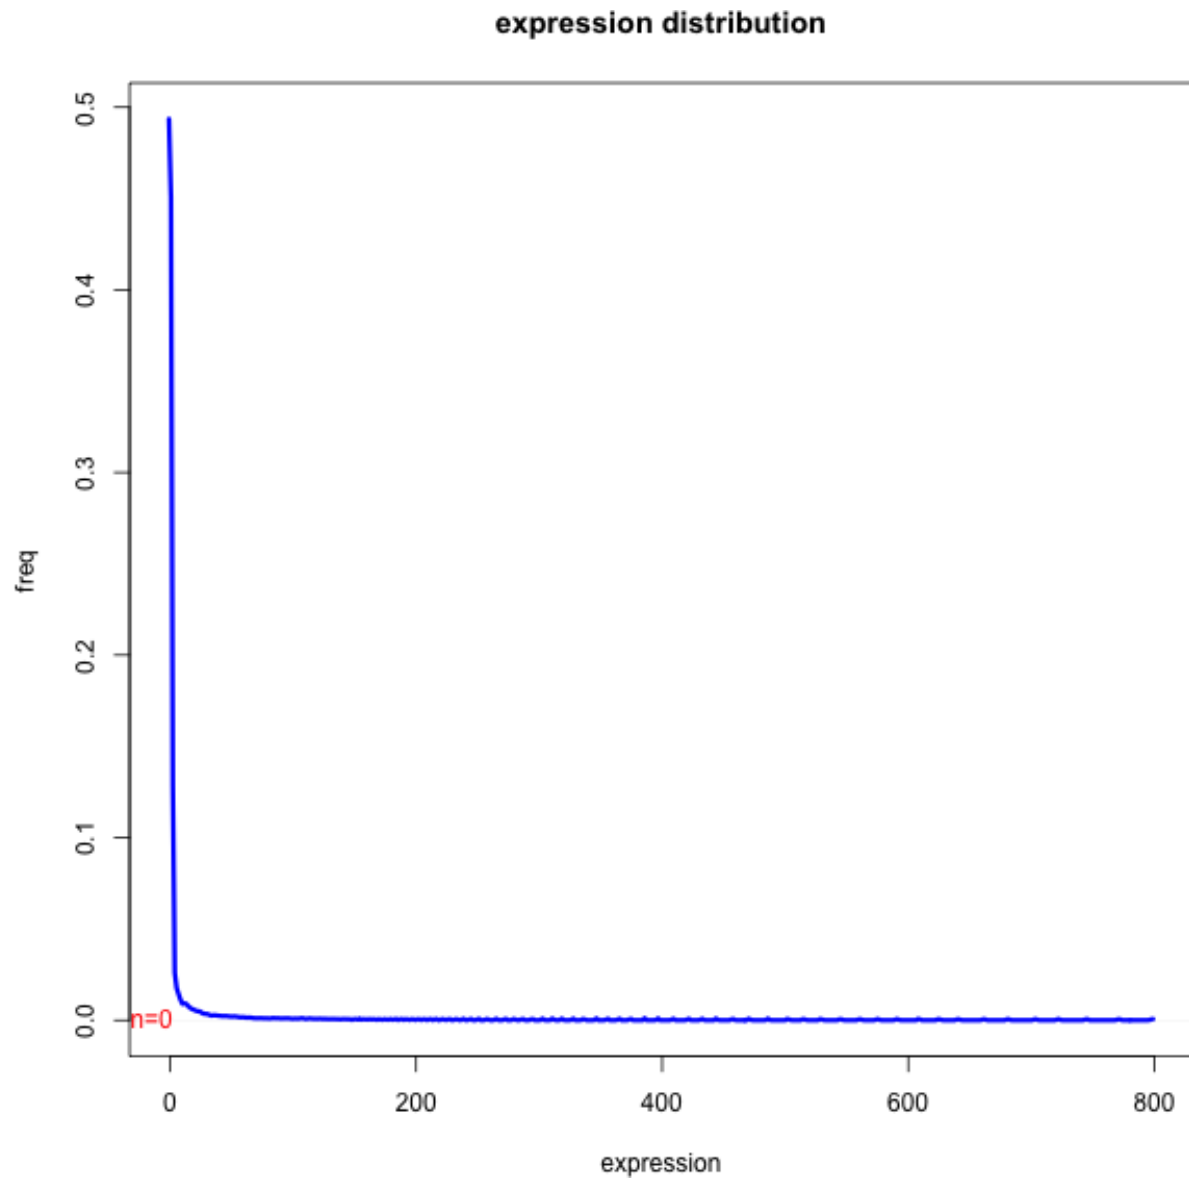

Figure S8: A curve describing a part of the expression value distribution of the samples in this study. Most genes yield very small expression values and only a few genes have high values.

## Correlations

Between sample correlation values describe the similarity between the samples in a general level, when all measurement features of all samples are taken into consideration. In this analysis the so called *Spearman's metrics* is used which describes the between sample similarity on a scale of 0-1. Value 0 means perfect uncorrelation between the samples whereas value 1 means perfect correlation between them.

The correlation values between all possible pairs of samples are visualized for both spike-in reads and genomic reads in the figure below.

Table S5: GroupWise correlation values for spike-ins.

| GroupName | minCor | meanCor | medianCor | maxCor | corSD |
|-----------|--------|---------|-----------|--------|-------|
| spike-in  | 0.596  | 0.889   | 0.902     | 0.995  | 0.065 |

Table S6: GroupWise correlation values for genomic reads.

| GroupName | minCor | meanCor | medianCor | maxCor | corSD |
|-----------|--------|---------|-----------|--------|-------|
| tissue    | 0.754  | 0.812   | 0.818     | 0.853  | 0.03  |
| NSCLC     | 0.546  | 0.686   | 0.69      | 0.796  | 0.041 |
| Control   | 0.641  | 0.731   | 0.732     | 0.804  | 0.02  |

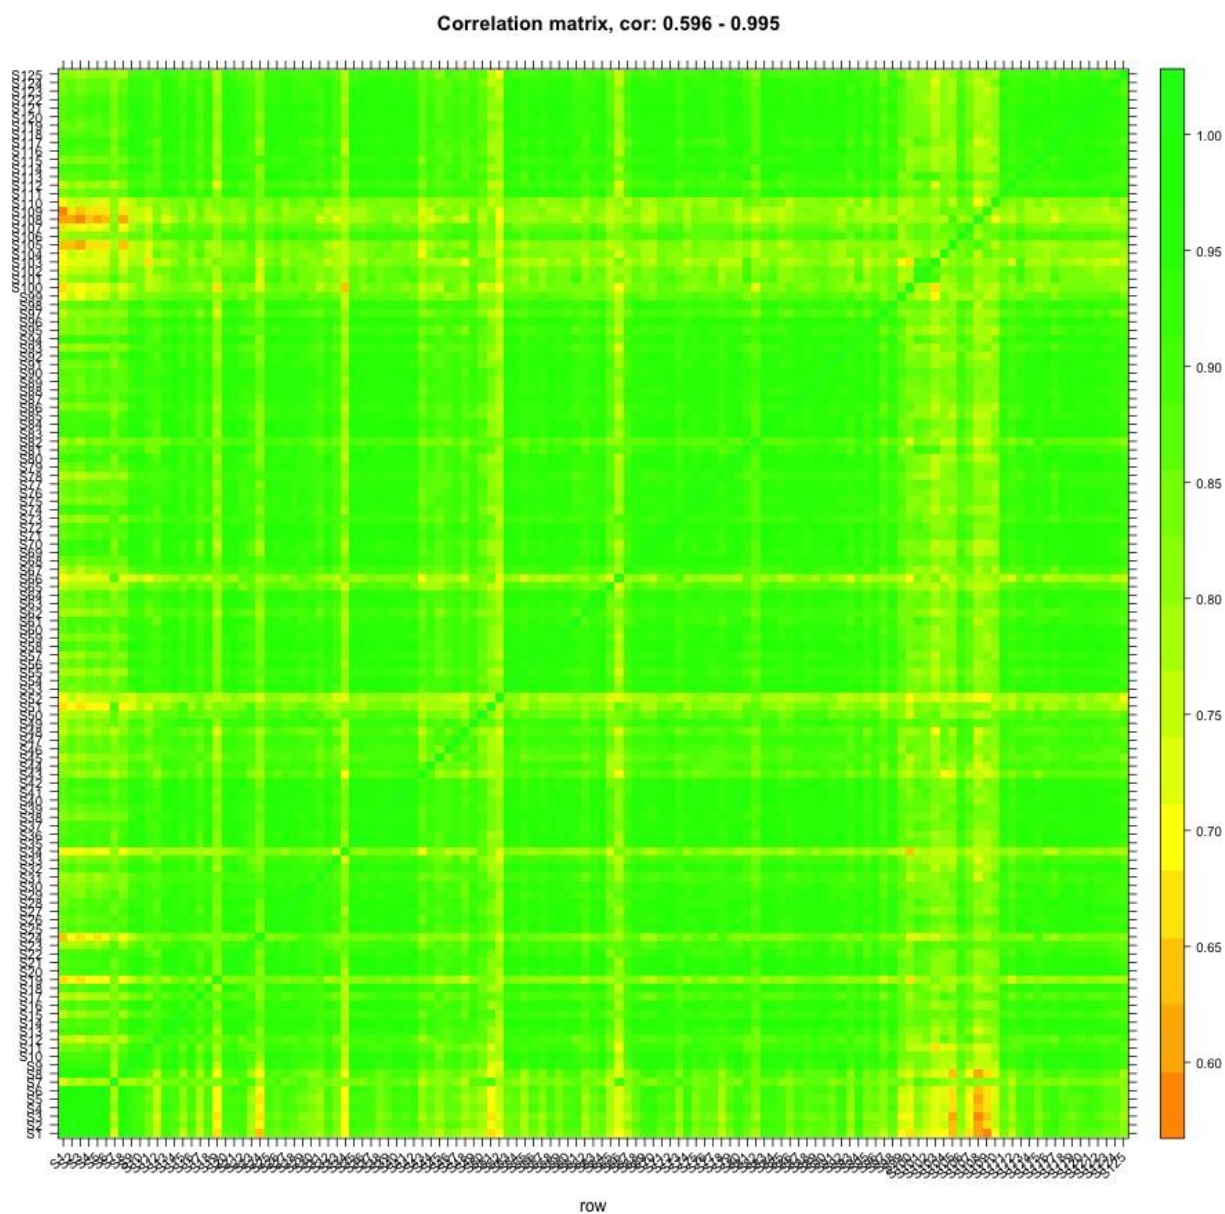

Figure S9: Sample correlations for spike-in reads.



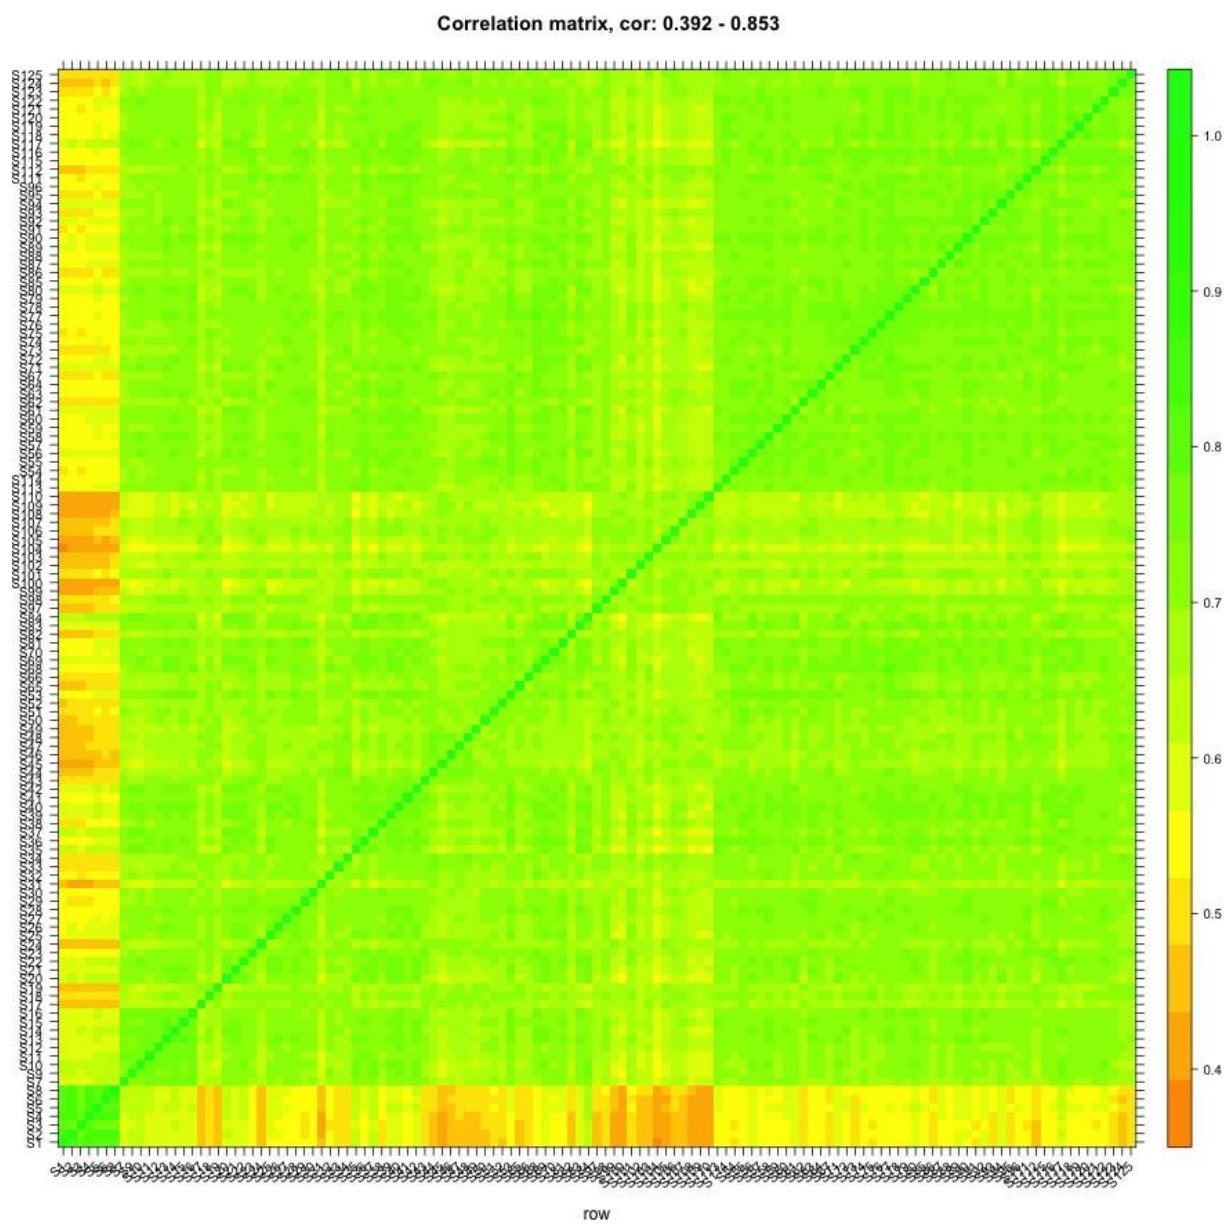

Figure S10: Sample correlations for genomic reads.

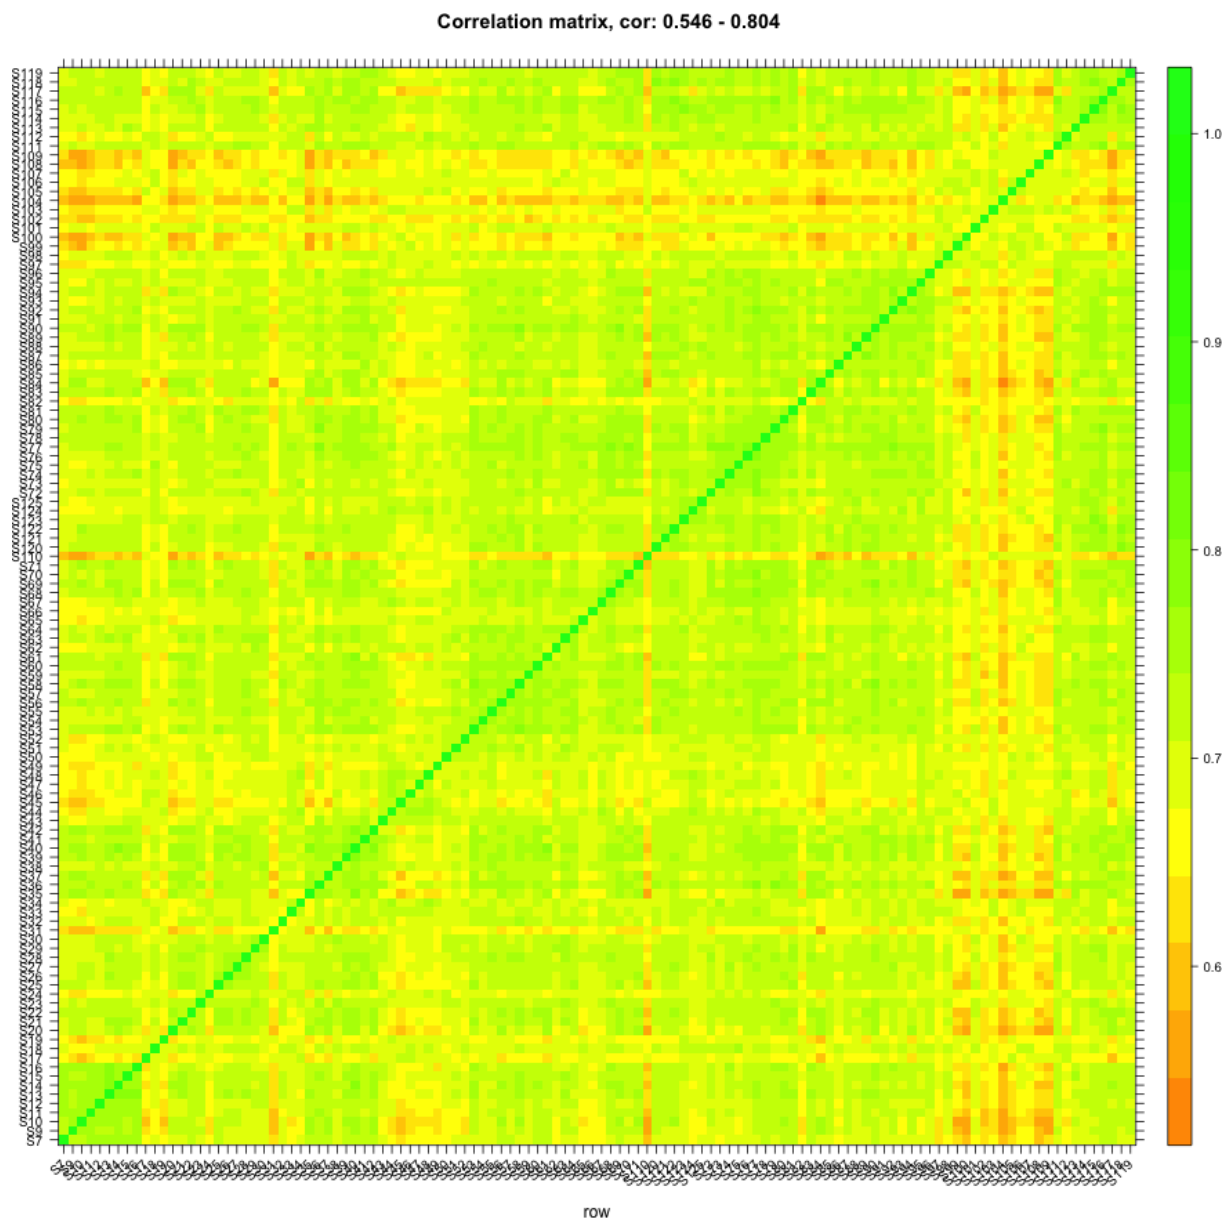

Figure S11: Sample correlations for genomic reads without tissue samples.

## Hierarchical clustering

In hierarchical clustering the samples are grouped according to their general similarity when all the measurements of all the samples are taken into consideration. In this analysis the samples were clustered with Euclidean metrics.

The result of the cluster analysis can be visualised as a *dendrogram*, which is an out branching graph where the most similar samples (in another words best correlating) can be found in the branches that are nearest to one another.

Dendrograms produced by cluster analysis for both spike-in reads and genomic reads are shown in the figures below.

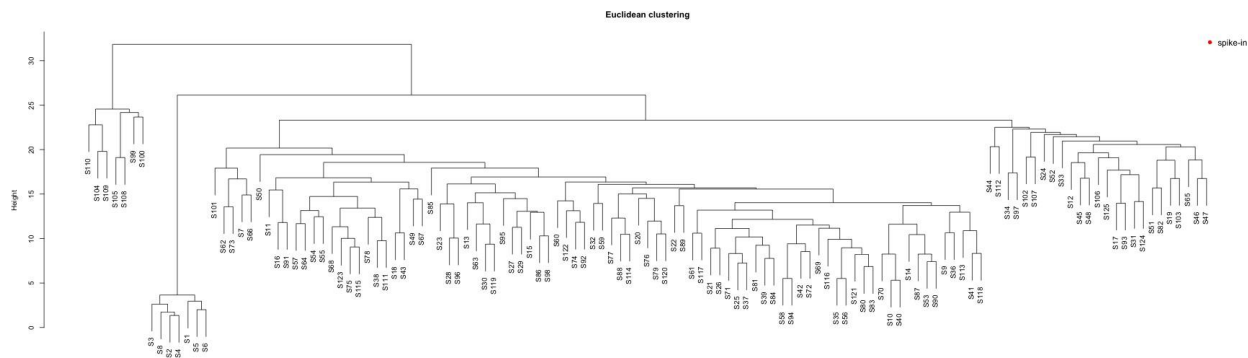

Figure S12: Hierarchical clustering for spike-in reads

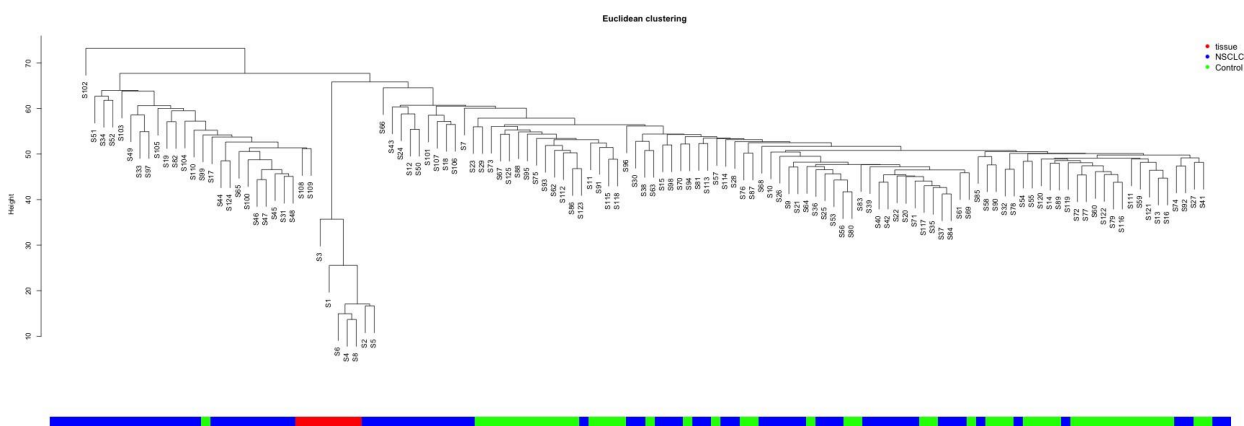

Figure S13: Hierarchical clustering for genomic reads

## PCA

The sample relations can also be studied by the means of a Principal Component Analysis (PCA) which is an ordination technique complementary to clustering. Ordination orders objects so that similar objects are placed near each other and dissimilar objects are placed further from each other.

In PCA analysis the sample relationships can be visualized in three dimensional space. Figures below show the PCA plots for both spike-in reads and genomic reads.

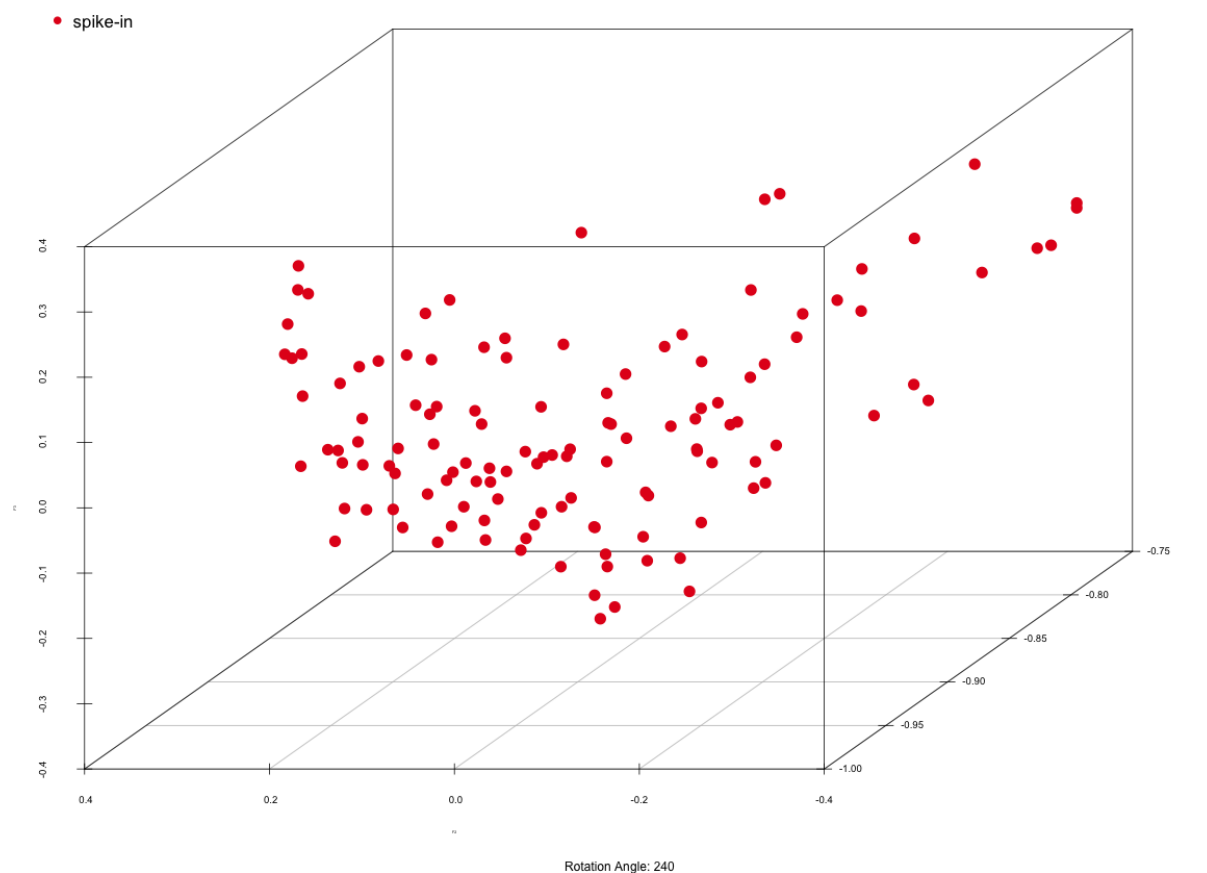

Figure S14: PCA plot for spike-in reads

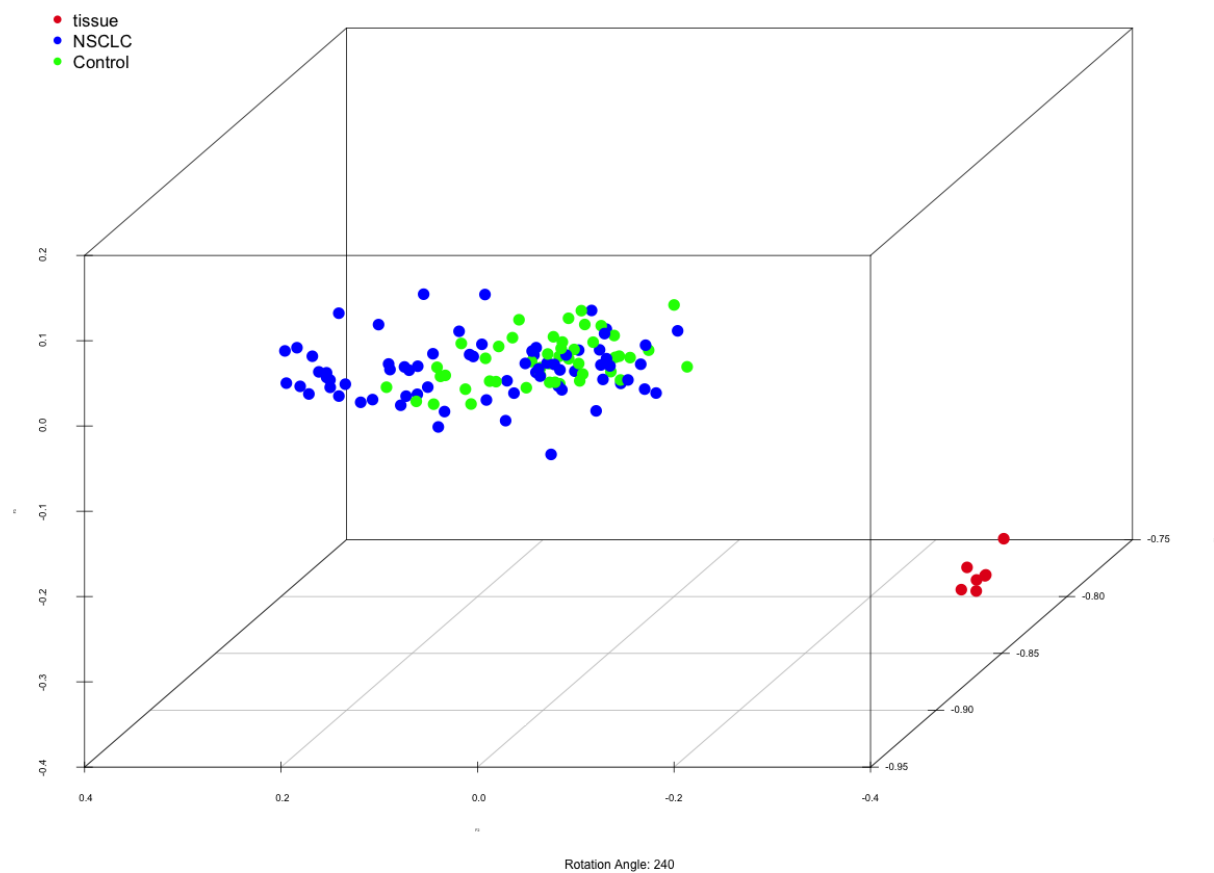

Figure S15: PCA plot for genomic read

## Differential expression analysis

The following comparisons were performed to detect differentially expressed genes between groups:

|                  |
|------------------|
| x                |
| NSCLC_vs_control |

R package limma was used to perform the statistical testing. More information on the package can also be found in the limma user guide.

### Filtering parameters

When filtering up- and down-regulated (i.e. differentially expressed = DE) genes between certain conditions (groups) fold changes and p-values (or multiple testing corrected p-values) calculated during statistical testing are used as filtering criteria.

All of the measured genes are filtered to list those that show the strongest evidence for being differentially expressed between the compared groups.

Short descriptions of fold change and p-values:

- **Fold change** (FC) describes the size of the difference in gene expression between the compared groups. In this analysis it results from linear modeling process performed with Limma package. Fold changes are often expressed as log2-transformed, where value 0 means ‘no change’ and 1 means doubled value and -1 means halved value. The values are always in relation to the group used as a base level group (reference).
- **P-value** describes the reliability of the change in expression value between the compared groups. Better (i.e. smaller) p-value is given for those genes that show homogeneous behaviour inside each group and yet clearly differ between the compared groups. In this analysis the p-values used for filtering can be either so called modified t-test p-values or *FDR* (false-discovery-rate) p-values which are both produced by Limma. Modified t-test p-values are not corrected for multiple testing. FDR p-values are used to control the rate of false positive findings in the result list and have been generally found to perform better than traditional p-values.

### Choosing thresholds for filtering

The choice of the thresholds for p-value and fold change used for filtering the differentially expressed (DE) genes is not a trivial task. There is no one correct way or method to determine the thresholds but the choice is based on different aspects of each study. Different thresholds can also be used for filtering the data for different purposes. For example, often very strict thresholds are chosen when the data is filtered to be included in a publication. Then the result list will contain very few false positive findings but on the other hand many true positives are left outside the result set. Because of this it is typically useful to use less stringent thresholds for filtering data for internal research purposes or functional analysis when a larger proportion of possible false positive findings can be tolerated. Cluster analysis of the filtered genes can also be used as a means for choosing the filtering thresholds: such thresholds should be chosen, that the samples are grouping according to the known sample groups in the cluster analysis of the filtered genes.
