# Supplementary material for: Serum Insights: Leveraging the Power of miRNA Profiling as an Early Diagnostic Tool for Non-Small Cell Lung Cancer
Source: MDPI journal article supplement (doi:10.3390/cancers15204910), 2023-10-10
Supplement: s1 [file s1]

**Table S9.** DE miRNAs between cancerous and non-cancerous patients

| Subgroups       | upregulated DE miRNAs | downregulated DE miRNAs |
|-----------------|-----------------------|-------------------------|
| NSCLC vs COPD   | 27                    | 0                       |
| NSCLC vs noCOPD | 12                    | 0                       |
| COPD vs noCOPD  | 6                     | 13                      |
| AC vs COPD      | 892                   | 12                      |
| AC vs noCOPD    | 896                   | 13                      |
| AC vs SCC       | 425                   | 0                       |
| SCC vs COPD     | 15                    | 0                       |
| SCC vs noCOPD   | 12                    | 0                       |

**Table S10.** Shared DE miRNAs between subgroups

| ID               | NSCLC_vs_COPD | NSCLC_vs_noCOPD | COPD_vs_noCOPD |
|------------------|---------------|-----------------|----------------|
| hsa-let-7e-3p    | 1             | 0               | 0              |
| hsa-let-7i-5p    | 0             | 0               | 1              |
| hsa-miR-1225-5p  | 1             | 0               | 0              |
| hsa-miR-135a-5p  | 1             | 0               | 0              |
| hsa-miR-135b-5p  | 1             | 1               | 0              |
| hsa-miR-143-5p   | 1             | 0               | 0              |
| hsa-miR-181c-5p  | 0             | 0               | -1             |
| hsa-miR-190b     | 1             | 0               | 0              |
| hsa-miR-191-3p   | 0             | 0               | 1              |
| hsa-miR-194-3p   | 1             | 0               | -1             |
| hsa-miR-200a-5p  | 1             | 1               | 0              |
| hsa-miR-202-3p   | 0             | 1               | 1              |
| hsa-miR-205-5p   | 0             | 1               | 0              |
| hsa-miR-23b-5p   | 0             | 0               | -1             |
| hsa-miR-29b-1-5p | 1             | 0               | -1             |
| hsa-miR-3173-3p  | 1             | 1               | 0              |
| hsa-miR-3178     | 0             | 1               | 0              |
| hsa-miR-3180     | 1             | 0               | 0              |
| hsa-miR-3180-3p  | 1             | 0               | 0              |
| hsa-miR-3199     | 0             | 0               | 1              |
| hsa-miR-4488     | 1             | 0               | 0              |
| hsa-miR-4492     | 0             | 1               | 0              |
| hsa-miR-4532     | 1             | 0               | 0              |
| hsa-miR-454-3p   | 0             | 0               | -1             |
| hsa-miR-4637     | 0             | 0               | -1             |
| hsa-miR-4646-5p  | 0             | 1               | 0              |
| hsa-miR-4723-3p  | 0             | 0               | 1              |
| hsa-miR-485-3p   | 0             | 0               | -1             |
| hsa-miR-485-5p   | 0             | 0               | -1             |
| hsa-miR-491-5p   | 1             | 0               | 0              |
| hsa-miR-511-3p   | 0             | 0               | -1             |

|                  |   |   |    |
|------------------|---|---|----|
| hsa-miR-624-5p   | 0 | 0 | -1 |
| hsa-miR-6763-5p  | 0 | 0 | -1 |
| hsa-miR-6772-3p  | 1 | 0 | 0  |
| hsa-miR-6809-5p  | 0 | 1 | 0  |
| hsa-miR-6819-3p  | 1 | 1 | 0  |
| hsa-miR-6821-5p  | 1 | 1 | 0  |
| hsa-miR-6828-3p  | 1 | 0 | 0  |
| hsa-miR-6837-3p  | 1 | 0 | 0  |
| hsa-miR-6852-3p  | 0 | 0 | 1  |
| hsa-miR-6876-5p  | 1 | 0 | 0  |
| hsa-miR-6891-5p  | 1 | 0 | 0  |
| hsa-miR-766-5p   | 1 | 0 | 0  |
| hsa-miR-7704     | 1 | 0 | -1 |
| hsa-miR-8072     | 1 | 0 | 0  |
| hsa-miR-873-3p   | 1 | 0 | 0  |
| hsa-miR-92a-1-5p | 1 | 0 | 0  |
| hsa-miR-96-5p    | 0 | 0 | -1 |

**Table S11.** NSCLC vs control\_GO\_BP\_results

| GO Category                                                                    | p-value   | No of genes | No of miRNAs |
|--------------------------------------------------------------------------------|-----------|-------------|--------------|
| cellular nitrogen compound metabolic process                                   | 4.23E-132 | 971         | 14           |
| gene expression                                                                | 4.60E-101 | 229         | 13           |
| biosynthetic process                                                           | 5.66E-93  | 806         | 15           |
| viral process                                                                  | 1.60E-58  | 159         | 14           |
| symbiosis. encompassing mutualism through parasitism                           | 5.42E-58  | 171         | 14           |
| cellular protein modification process                                          | 6.23E-51  | 463         | 15           |
| biological process                                                             | 2.92E-44  | 2423        | 16           |
| catabolic process                                                              | 6.18E-43  | 393         | 14           |
| small molecule metabolic process                                               | 2.38E-39  | 433         | 14           |
| response to stress                                                             | 3.06E-37  | 438         | 14           |
| mitotic cell cycle                                                             | 1.12E-35  | 116         | 13           |
| cellular protein metabolic process                                             | 2.43E-35  | 126         | 11           |
| membrane organization                                                          | 1.99E-33  | 155         | 13           |
| neurotrophin TRK receptor signaling pathway                                    | 1.52E-31  | 80          | 12           |
| cellular component assembly                                                    | 1.96E-31  | 270         | 15           |
| cell death                                                                     | 2.71E-31  | 214         | 14           |
| macromolecular complex assembly                                                | 3.08E-31  | 203         | 15           |
| nucleobase-containing compound catabolic process                               | 3.31E-29  | 200         | 13           |
| mRNA metabolic process                                                         | 1.05E-25  | 70          | 12           |
| RNA metabolic process                                                          | 4.41E-24  | 76          | 12           |
| DNA metabolic process                                                          | 3.75E-21  | 169         | 14           |
| Fc-epsilon receptor signaling pathway                                          | 1.58E-19  | 48          | 13           |
| protein complex assembly                                                       | 1.15E-18  | 159         | 15           |
| blood coagulation                                                              | 1.10E-17  | 98          | 13           |
| activation of signaling protein activity involved in unfolded protein response | 4.89E-17  | 30          | 10           |

|                                                                                                              |          |     |    |
|--------------------------------------------------------------------------------------------------------------|----------|-----|----|
| TRIF-dependent toll-like receptor signaling pathway                                                          | 4.89E-17 | 30  | 11 |
| MyD88-independent toll-like receptor signaling pathway                                                       | 2.47E-15 | 30  | 11 |
| transcription initiation from RNA polymerase II promoter                                                     | 1.55E-14 | 63  | 12 |
| toll-like receptor 3 signaling pathway                                                                       | 2.05E-14 | 31  | 11 |
| toll-like receptor 10 signaling pathway                                                                      | 5.53E-14 | 25  | 10 |
| toll-like receptor TLR1:TLR2 signaling pathway                                                               | 3.83E-13 | 25  | 10 |
| toll-like receptor TLR6:TLR2 signaling pathway                                                               | 3.83E-13 | 25  | 10 |
| regulation of ubiquitin-protein ligase activity involved in mitotic cell cycle                               | 4.62E-13 | 28  | 9  |
| viral life cycle                                                                                             | 6.04E-13 | 35  | 12 |
| epidermal growth factor receptor signaling pathway                                                           | 6.04E-13 | 54  | 12 |
| immune system process                                                                                        | 1.19E-12 | 263 | 14 |
| positive regulation of ubiquitin-protein ligase activity involved in mitotic cell cycle                      | 1.35E-12 | 27  | 9  |
| toll-like receptor 5 signaling pathway                                                                       | 1.98E-12 | 25  | 10 |
| toll-like receptor 9 signaling pathway                                                                       | 3.07E-12 | 26  | 10 |
| transcription. DNA-templated                                                                                 | 9.34E-12 | 407 | 14 |
| G2/M transition of mitotic cell cycle                                                                        | 9.34E-12 | 44  | 12 |
| fibroblast growth factor receptor signaling pathway                                                          | 1.13E-11 | 51  | 13 |
| toll-like receptor 4 signaling pathway                                                                       | 2.84E-11 | 31  | 11 |
| anaphase-promoting complex-dependent proteasomal ubiquitin-dependent protein catabolic process               | 4.37E-11 | 30  | 9  |
| generation of precursor metabolites and energy                                                               | 4.50E-11 | 73  | 14 |
| mitotic nuclear envelope disassembly                                                                         | 6.10E-11 | 17  | 10 |
| toll-like receptor 2 signaling pathway                                                                       | 1.07E-10 | 26  | 10 |
| stress-activated MAPK cascade                                                                                | 1.11E-10 | 22  | 10 |
| toll-like receptor signaling pathway                                                                         | 1.92E-10 | 33  | 11 |
| RNA splicing                                                                                                 | 2.80E-10 | 78  | 13 |
| hexose transport                                                                                             | 6.30E-10 | 17  | 10 |
| DNA damage response. signal transduction by p53 class mediator resulting in cell cycle arrest                | 8.72E-10 | 26  | 10 |
| negative regulation of ubiquitin-protein ligase activity involved in mitotic cell cycle                      | 1.09E-09 | 23  | 8  |
| Fc-gamma receptor signaling pathway involved in phagocytosis                                                 | 2.00E-09 | 22  | 10 |
| G1/S transition of mitotic cell cycle                                                                        | 2.50E-09 | 48  | 11 |
| mRNA processing                                                                                              | 3.78E-09 | 110 | 13 |
| endoplasmic reticulum unfolded protein response                                                              | 4.15E-09 | 39  | 11 |
| post-translational protein modification                                                                      | 8.33E-09 | 36  | 9  |
| MyD88-dependent toll-like receptor signaling pathway                                                         | 9.22E-09 | 28  | 10 |
| positive regulation of protein insertion into mitochondrial membrane involved in apoptotic signaling pathway | 2.89E-08 | 14  | 9  |
| ribonucleoprotein complex assembly                                                                           | 3.19E-08 | 39  | 11 |
| mRNA splicing. via spliceosome                                                                               | 3.85E-08 | 60  | 12 |
| platelet activation                                                                                          | 4.03E-08 | 43  | 12 |
| regulation of glucose transport                                                                              | 4.22E-08 | 14  | 10 |

|                                                                                                 |          |     |    |
|-------------------------------------------------------------------------------------------------|----------|-----|----|
| cellular component disassembly involved in execution phase of apoptosis                         | 5.50E-08 | 16  | 8  |
| termination of RNA polymerase II transcription                                                  | 5.99E-08 | 17  | 11 |
| cellular component movement                                                                     | 6.46E-08 | 31  | 11 |
| protein N-linked glycosylation via asparagine                                                   | 7.69E-08 | 27  | 10 |
| innate immune response                                                                          | 9.15E-08 | 123 | 13 |
| SRP-dependent cotranslational protein targeting to membrane                                     | 1.23E-07 | 32  | 10 |
| chromatin organization                                                                          | 1.52E-07 | 33  | 11 |
| phosphatidylinositol-mediated signaling                                                         | 1.82E-07 | 34  | 12 |
| negative regulation of apoptotic process                                                        | 2.12E-07 | 139 | 13 |
| cell cycle                                                                                      | 3.45E-07 | 163 | 14 |
| cell junction organization                                                                      | 3.72E-07 | 36  | 12 |
| intrinsic apoptotic signaling pathway                                                           | 4.87E-07 | 22  | 11 |
| mRNA 3'-end processing                                                                          | 5.60E-07 | 15  | 9  |
| viral transcription                                                                             | 9.60E-07 | 21  | 9  |
| regulation of cellular amino acid metabolic process                                             | 1.00E-06 | 17  | 7  |
| nucleotide-binding domain, leucine rich repeat containing receptor signaling pathway            | 1.31E-06 | 14  | 10 |
| vesicle-mediated transport                                                                      | 1.33E-06 | 167 | 15 |
| antigen processing and presentation of exogenous peptide antigen via MHC class II               | 1.45E-06 | 30  | 11 |
| intracellular transport of virus                                                                | 4.27E-06 | 10  | 8  |
| nuclear-transcribed mRNA catabolic process, nonsense-mediated decay                             | 4.52E-06 | 32  | 11 |
| protein targeting                                                                               | 4.54E-06 | 57  | 11 |
| transcription from RNA polymerase II promoter                                                   | 4.88E-06 | 113 | 14 |
| cellular lipid metabolic process                                                                | 5.43E-06 | 29  | 10 |
| post-Golgi vesicle-mediated transport                                                           | 7.15E-06 | 16  | 9  |
| regulation of transcription from RNA polymerase II promoter in response to hypoxia              | 9.13E-06 | 12  | 8  |
| transforming growth factor beta receptor signaling pathway                                      | 9.66E-06 | 43  | 11 |
| translational termination                                                                       | 1.60E-05 | 23  | 9  |
| energy reserve metabolic process                                                                | 1.60E-05 | 23  | 10 |
| nucleobase-containing small molecule metabolic process                                          | 1.68E-05 | 17  | 10 |
| positive regulation of type I interferon production                                             | 1.98E-05 | 18  | 11 |
| protein polyubiquitination                                                                      | 2.95E-05 | 38  | 11 |
| nuclear-transcribed mRNA catabolic process, deadenylation-dependent decay                       | 3.95E-05 | 17  | 9  |
| apoptotic signaling pathway                                                                     | 4.18E-05 | 30  | 12 |
| cytoskeleton organization                                                                       | 4.63E-05 | 109 | 12 |
| nucleotide-binding oligomerization domain containing signaling pathway                          | 5.96E-05 | 9   | 8  |
| platelet degranulation                                                                          | 8.56E-05 | 17  | 10 |
| antigen processing and presentation of exogenous peptide antigen via MHC class I                | 9.09E-05 | 23  | 9  |
| antigen processing and presentation of exogenous peptide antigen via MHC class I, TAP-dependent | 9.87E-05 | 22  | 9  |

|                                                                        |             |     |    |
|------------------------------------------------------------------------|-------------|-----|----|
| axon guidance                                                          | 0.000182637 | 78  | 12 |
| telomere maintenance via semi-conservative replication                 | 0.000192375 | 8   | 5  |
| glucose transport                                                      | 0.000203894 | 20  | 10 |
| extracellular matrix disassembly                                       | 0.000209369 | 22  | 10 |
| protein maturation                                                     | 0.000210182 | 39  | 13 |
| in utero embryonic development                                         | 0.00021689  | 67  | 12 |
| DNA strand elongation involved in DNA replication                      | 0.000275501 | 10  | 6  |
| translational initiation                                               | 0.000275501 | 46  | 10 |
| purine nucleobase metabolic process                                    | 0.00029211  | 13  | 6  |
| androgen receptor signaling pathway                                    | 0.000373334 | 17  | 11 |
| apoptotic process                                                      | 0.000451311 | 147 | 13 |
| positive regulation of viral transcription                             | 0.000486799 | 13  | 8  |
| regulation of interferon-gamma-mediated signaling pathway              | 0.000511582 | 8   | 7  |
| regulation of type I interferon-mediated signaling pathway             | 0.000659757 | 9   | 7  |
| leukocyte migration                                                    | 0.000798242 | 23  | 11 |
| negative regulation of transcription from RNA polymerase II promoter   | 0.000798242 | 168 | 14 |
| DNA damage response. detection of DNA damage                           | 0.000841576 | 7   | 6  |
| cytokine-mediated signaling pathway                                    | 0.000867079 | 54  | 13 |
| nitric oxide metabolic process                                         | 0.000909585 | 8   | 6  |
| transcription elongation from RNA polymerase II promoter               | 0.001062741 | 18  | 8  |
| insulin receptor signaling pathway                                     | 0.001131027 | 32  | 11 |
| water-soluble vitamin metabolic process                                | 0.001394703 | 14  | 7  |
| phosphatidylinositol biosynthetic process                              | 0.001521324 | 15  | 10 |
| telomere maintenance via recombination                                 | 0.001625016 | 9   | 5  |
| nuclear-transcribed mRNA poly(A) tail shortening                       | 0.002192814 | 11  | 7  |
| cellular response to hypoxia                                           | 0.002459043 | 32  | 12 |
| negative regulation of intrinsic apoptotic signaling pathway           | 0.002941436 | 14  | 7  |
| long-chain fatty-acyl-CoA biosynthetic process                         | 0.003816109 | 6   | 4  |
| anatomical structure morphogenesis                                     | 0.004028966 | 21  | 10 |
| homeostatic process                                                    | 0.004203422 | 115 | 11 |
| antigen processing and presentation of peptide antigen via MHC class I | 0.005009354 | 29  | 10 |
| negative regulation of type I interferon production                    | 0.00508742  | 11  | 10 |
| vitamin metabolic process                                              | 0.005139884 | 14  | 7  |
| histone mRNA metabolic process                                         | 0.006009072 | 5   | 6  |
| positive regulation of muscle cell differentiation                     | 0.006198935 | 9   | 9  |
| response to virus                                                      | 0.006714322 | 35  | 10 |
| mRNA transport                                                         | 0.006764467 | 22  | 12 |
| cofactor metabolic process                                             | 0.006834602 | 39  | 12 |
| positive regulation of apoptotic process                               | 0.007513852 | 77  | 13 |
| viral protein processing                                               | 0.007934651 | 6   | 7  |
| Notch signaling pathway                                                | 0.00846619  | 37  | 11 |
| nucleotide-excision repair. DNA gap filling                            | 0.008508258 | 8   | 6  |
| cell motility                                                          | 0.008617324 | 81  | 13 |
| nucleotide-excision repair. DNA damage removal                         | 0.009236484 | 7   | 7  |

|                                                              |             |     |    |
|--------------------------------------------------------------|-------------|-----|----|
| DNA biosynthetic process                                     | 0.009236484 | 12  | 7  |
| cellular response to glucose starvation                      | 0.010061119 | 10  | 5  |
| cell junction assembly                                       | 0.010103868 | 12  | 8  |
| glucose metabolic process                                    | 0.010103868 | 29  | 11 |
| regulation of apoptotic process                              | 0.010103868 | 50  | 12 |
| RNA splicing, via transesterification reactions              | 0.010967564 | 9   | 7  |
| nucleocytoplasmic transport                                  | 0.010967564 | 56  | 13 |
| membrane fusion                                              | 0.012160342 | 11  | 9  |
| negative regulation of anoikis                               | 0.012721231 | 10  | 7  |
| transport                                                    | 0.012727424 | 535 | 15 |
| regulation of nitric-oxide synthase activity                 | 0.013212524 | 7   | 6  |
| DNA repair                                                   | 0.013212524 | 83  | 13 |
| ATP-dependent chromatin remodeling                           | 0.013244739 | 13  | 11 |
| transcription-coupled nucleotide-excision repair             | 0.013394266 | 12  | 7  |
| respiratory electron transport chain                         | 0.013394266 | 19  | 11 |
| modulation by virus of host morphology or physiology         | 0.013480131 | 6   | 7  |
| COPII vesicle coating                                        | 0.015657473 | 7   | 4  |
| positive regulation of transcription, DNA-templated          | 0.017960676 | 139 | 14 |
| carbohydrate metabolic process                               | 0.018245417 | 138 | 15 |
| osteoblast differentiation                                   | 0.018626649 | 34  | 12 |
| endosomal transport                                          | 0.019706852 | 18  | 11 |
| response to amino acid                                       | 0.020604471 | 13  | 7  |
| negative regulation of extrinsic apoptotic signaling pathway | 0.020604471 | 17  | 8  |
| type I interferon signaling pathway                          | 0.02063763  | 14  | 8  |
| cell proliferation                                           | 0.021292294 | 95  | 13 |
| regulation of cell cycle                                     | 0.022342712 | 45  | 13 |
| negative regulation of neuron apoptotic process              | 0.023213538 | 41  | 12 |
| regulation of insulin secretion                              | 0.024452404 | 20  | 9  |
| negative regulation of Schwann cell proliferation            | 0.024775925 | 4   | 7  |
| translational elongation                                     | 0.026088388 | 26  | 9  |
| positive regulation of axonogenesis                          | 0.026959213 | 10  | 7  |
| response to unfolded protein                                 | 0.029868151 | 16  | 7  |
| phospholipid metabolic process                               | 0.029868151 | 26  | 12 |
| regulation of microtubule-based process                      | 0.030388944 | 8   | 9  |
| cytoskeleton-dependent intracellular transport               | 0.031012709 | 19  | 9  |
| L-ascorbic acid metabolic process                            | 0.031179014 | 5   | 4  |
| cotranslational protein targeting to membrane                | 0.031179014 | 5   | 8  |
| mRNA splice site selection                                   | 0.032555936 | 10  | 8  |
| plus-end-directed vesicle transport along microtubule        | 0.033692119 | 4   | 4  |
| glycerophospholipid biosynthetic process                     | 0.034115364 | 14  | 8  |
| release of cytochrome c from mitochondria                    | 0.034279379 | 11  | 7  |
| protein localization to endosome                             | 0.034682881 | 6   | 5  |
| NLS-bearing protein import into nucleus                      | 0.038182768 | 8   | 5  |
| cellular response to nerve growth factor stimulus            | 0.043628312 | 8   | 5  |
| response to calcium ion                                      | 0.045888037 | 20  | 8  |
| peptidyl-threonine phosphorylation                           | 0.045888037 | 16  | 9  |
| cellular response to amino acid stimulus                     | 0.047918665 | 17  | 8  |

**Table S12.** NSCLC vs control\_GO\_CC\_results

| GO Category                     | p-value     | No of genes | No of miRNAs |
|---------------------------------|-------------|-------------|--------------|
| organelle                       | 6.50E-269   | 1890        | 15           |
| nucleoplasm                     | 2.07E-70    | 338         | 13           |
| protein complex                 | 9.83E-64    | 749         | 15           |
| cytosol                         | 1.30E-56    | 574         | 15           |
| cellular component              | 1.75E-49    | 2490        | 16           |
| focal adhesion                  | 4.33E-07    | 117         | 13           |
| microtubule organizing center   | 5.69E-07    | 87          | 11           |
| nuclear chromatin               | 0.005362329 | 49          | 13           |
| cytoplasmic stress granule      | 0.009041759 | 17          | 8            |
| nucleolus                       | 0.013837147 | 158         | 14           |
| lysosomal lumen                 | 0.017379689 | 13          | 7            |
| heterochromatin                 | 0.035105542 | 16          | 9            |
| coated pit                      | 0.046519624 | 20          | 10           |
| extracellular vesicular exosome | 0.046519624 | 525         | 15           |

**Table S13.** NSCLC vs control\_GO\_MF\_results

| GO Category                                        | p-value     | No of genes | No of miRNAs |
|----------------------------------------------------|-------------|-------------|--------------|
| ion binding                                        | 7.11E-65    | 995         | 15           |
| molecular function                                 | 2.91E-57    | 2486        | 16           |
| RNA binding                                        | 1.33E-50    | 427         | 15           |
| enzyme binding                                     | 8.85E-45    | 302         | 15           |
| protein binding transcription factor activity      | 6.63E-29    | 130         | 14           |
| poly(A) RNA binding                                | 1.49E-25    | 353         | 15           |
| nucleic acid binding transcription factor activity | 1.77E-14    | 177         | 14           |
| cytoskeletal protein binding                       | 9.05E-13    | 145         | 13           |
| translation factor activity. nucleic acid binding  | 3.43E-08    | 35          | 10           |
| transcription factor binding                       | 3.43E-08    | 124         | 14           |
| transcription coactivator activity                 | 6.58E-06    | 72          | 13           |
| enzyme regulator activity                          | 6.58E-06    | 130         | 14           |
| small conjugating protein binding                  | 0.000304443 | 23          | 11           |
| transcription corepressor activity                 | 0.000689978 | 53          | 14           |
| chromatin binding                                  | 0.021834032 | 114         | 14           |
| androgen receptor binding                          | 0.023467259 | 15          | 12           |
| ligase activity                                    | 0.026172248 | 97          | 14           |
| nuclear localization sequence binding              | 0.032175028 | 6           | 4            |

**Table S14.** NSCLC vs control\_KEGG\_results

| KEGG pathway            | p-value  | No of genes | No of miRNAs |
|-------------------------|----------|-------------|--------------|
| Fatty acid biosynthesis | 4.74E-09 | 2           | 3            |
| Adherens junction       | 2.23E-06 | 29          | 12           |

|                                             |             |    |    |
|---------------------------------------------|-------------|----|----|
| p53 signaling pathway                       | 2.23E-06    | 34 | 13 |
| Oocyte meiosis                              | 6.46E-06    | 39 | 10 |
| Cell cycle                                  | 1.25E-05    | 46 | 11 |
| Central carbon metabolism in cancer         | 1.25E-05    | 27 | 11 |
| Protein processing in endoplasmic reticulum | 1.25E-05    | 60 | 12 |
| Hippo signaling pathway                     | 1.73E-05    | 46 | 14 |
| Viral carcinogenesis                        | 1.87E-05    | 59 | 12 |
| Lysine degradation                          | 0.000205089 | 16 | 10 |
| Shigellosis                                 | 0.000208027 | 27 | 11 |
| Small cell lung cancer                      | 0.000209101 | 34 | 10 |
| Hepatitis B                                 | 0.000209101 | 46 | 11 |
| Proteoglycans in cancer                     | 0.000256847 | 58 | 13 |
| Bacterial invasion of epithelial cells      | 0.000629281 | 30 | 12 |
| Prostate cancer                             | 0.000683627 | 33 | 11 |
| Spliceosome                                 | 0.000806205 | 42 | 12 |
| Pancreatic cancer                           | 0.000941618 | 24 | 11 |
| Colorectal cancer                           | 0.001026565 | 23 | 11 |
| Glioma                                      | 0.001052948 | 23 | 10 |
| RNA transport                               | 0.001052948 | 52 | 12 |
| Chronic myeloid leukemia                    | 0.001170238 | 26 | 11 |
| Endometrial cancer                          | 0.002560307 | 20 | 10 |
| Bladder cancer                              | 0.002909431 | 17 | 8  |
| HTLV-I infection                            | 0.002909431 | 75 | 14 |
| ErbB signaling pathway                      | 0.003473008 | 29 | 12 |
| Focal adhesion                              | 0.003473008 | 62 | 13 |
| Neurotrophin signaling pathway              | 0.003549326 | 40 | 12 |
| Base excision repair                        | 0.003713923 | 12 | 7  |
| Fatty acid metabolism                       | 0.004813961 | 8  | 5  |
| Transcriptional misregulation in cancer     | 0.008007297 | 43 | 11 |
| TGF-beta signaling pathway                  | 0.009467253 | 25 | 12 |
| HIF-1 signaling pathway                     | 0.009591052 | 34 | 12 |
| Sphingolipid signaling pathway              | 0.009808177 | 35 | 12 |
| FoxO signaling pathway                      | 0.01289245  | 42 | 13 |
| Thyroid cancer                              | 0.014660204 | 12 | 8  |
| Apoptosis                                   | 0.016905608 | 26 | 11 |
| ECM-receptor interaction                    | 0.017653143 | 20 | 8  |
| Progesterone-mediated oocyte maturation     | 0.025719409 | 28 | 11 |
| Renal cell carcinoma                        | 0.029622936 | 21 | 11 |
| DNA replication                             | 0.038149677 | 13 | 7  |
| TNF signaling pathway                       | 0.038149677 | 30 | 11 |
| Prolactin signaling pathway                 | 0.038149677 | 20 | 13 |
| Influenza A                                 | 0.038149677 | 49 | 13 |
| Endocytosis                                 | 0.039461589 | 54 | 13 |
| Thyroid hormone signaling pathway           | 0.043921423 | 34 | 12 |
| Epstein-Barr virus infection                | 0.044483181 | 55 | 11 |
| Nucleotide excision repair                  | 0.045804484 | 16 | 8  |
